# Supplementary material
Source: PubMed Central journal article supplement (PMC2805260)

# Rhodium-Catalyzed Asymmetric Enyne Cycloisomerization of Terminal Alkynes and Formal Total Synthesis of (–)-Platensimycin

*K. C. Nicolaou,\* Ang Li, Shelby P. Ellery, and David J. Edmonds*

Department of Chemistry and The Skaggs Institute for Chemical Biology, The Scripps Research  
Institute, 10550 North Torrey Pines Road, La Jolla, California 92037, and Department of  
Chemistry and Biochemistry, University of California, San Diego, 9500 Gilman Drive, La Jolla,  
California 92093

*Email : [kcn@scripps.edu](mailto:kcn@scripps.edu)*

**General Procedures.** All reactions were carried out under an argon atmosphere with dry solvents under anhydrous conditions, unless otherwise noted. Dry tetrahydrofuran (THF), methanol, triethylamine ( $\text{Et}_3\text{N}$ ), and methylene chloride ( $\text{CH}_2\text{Cl}_2$ ) were obtained by passing commercially available pre-dried, oxygen-free formulations through activated alumina columns. Dimethylsulfoxide (DMSO) and ethanol ( $\text{EtOH}$ ) were purchased in anhydrous form and used without further purification. Reagents were purchased at the highest commercial quality and used without further purification, unless otherwise stated. Reactions were monitored by thin layer chromatography (TLC) carried out on S-2 0.25 mm E. Merck silica gel plates (60F-254) using UV light as visualizing agent and ethanolic *p*-anisaldehyde, aqueous ammonium cerium nitrate/ammonium molybdate, or basic aqueous potassium permanganate as developing agents. E. Merck silica gel (60, particle size 0.040–0.063 mm) was used for flash column chromatography. Preparative thin layer chromatography separations were carried out on 0.25 or 0.50 mm E. Merck silica gel plates (60F-254). NMR spectra were recorded on Bruker AV-400, DRX-500 or DRX-600 instruments and calibrated using residual undeuterated chloroform ( $\delta_{\text{H}} = 7.26$  ppm) or  $\text{CDCl}_3$  ( $\delta_{\text{C}} = 77.0$  ppm) as an internal reference. The following abbreviations are used to designate multiplicities: s = singlet, d = doublet, t = triplet, q = quartet, m = multiplet, quint = quintet, br = broad. IR spectra were recorded on a Perkin–Elmer Spectrum 100 FT-IR spectrometer. Melting points (m.p.) are uncorrected and were recorded on a Thomas Hoover Uni-Melt apparatus. High-resolution mass spectra (HRMS) were recorded on an Agilent ESITOF (time of flight) mass spectrometer at a 4000 V emitter voltage.

**Preparation of catalyst  $[\text{Rh}((S)\text{-BINAP})]\text{SbF}_6$ .** The  $[\text{Rh}((S)\text{-BINAP})]\text{SbF}_6$  catalyst was freshly prepared according to the procedure reported by Wender et al.<sup>1</sup> and used within days.  $[\text{Rh}(\text{cod})\text{Cl}]_2$  (25.1 mg, 0.0509 mol) and  $\text{AgSbF}_6$  (35.0 mg, 0.1019 mol) were weighed out in a flame-dried 25 mL round-bottom flask filled with argon. Acetone (2.5 mL) was added, and a white precipitate formed immediately. After stirring at 23 °C for 20 min, the yellow suspension was filtered under argon into a flask containing (*S*)-BINAP (63.4 mg, 0.1018 mol). The resulting acetone solution was stirred for 20 min and could be directly used for entries 5, 8 and 9 in Table 2. Acetone was then carefully removed

under bubbling argon and finally under vacuum. The residue was dissolved in 1,2-dichloroethane (DCE, 2.5 mL) and the resulting solution was stirred at 23 °C for 5 min until homogeneous. The catalyst in both acetone and DCE kept at 4 °C for 5 days gave the same efficiency and optical activity in the cycloisomerization reaction as tested with substrates **1** and **6** (entries 1 and 6, Table 2).

**General procedure for Rh-catalyzed cycloisomerization.** To a vial containing 0.08 mmol of the 1,6-enyne substrate under argon was added [Rh((*S*)-BINAP)]SbF<sub>6</sub> solution (0.20 mL, 0.04 M in DCE or acetone). The resulting mixture was stirred at 23 °C for 12–16 h. After removal of the solvent by a stream of argon, the residue was purified by flash column chromatography using EtOAc/hexanes (1:3–1:1) as eluent.

**Measurement of enantiomeric excess (ee).** Racemic and optically active aldehydes were prepared with [Rh((±)-BINAP)]SbF<sub>6</sub> and [Rh((*S*)-BINAP)]SbF<sub>6</sub> employing the general procedure described below, respectively. Cyclized products were reduced with NaBH<sub>4</sub> (**1a**, **2a**, **4a**, **7a**, **9a** and **10a**) or LiBH<sub>4</sub> (**5a** and **8a**) and ee's were measured after derivatization to the corresponding *p*-bromobenzoate esters<sup>2</sup> (Table 2, entries 1 and 2, by chiral HPLC, OD-H column) or to Mosher esters<sup>2</sup> (Table 2, entries 3–5 and 7–10, by <sup>1</sup>H and <sup>19</sup>F NMR spectroscopic analysis). Compounds **6a** and **11a** were converted to the corresponding ethylene glycol acetals (TMSOCH<sub>2</sub>CH<sub>2</sub>OTMS, TMSOTf) and the ee's were measured by chiral HPLC (OD-H column).

**1a:** 19.2 mg, 86 %, >99 % ee (chiral HPLC analysis of the corresponding *p*-bromobenzoate ester,<sup>[2]</sup> OD-

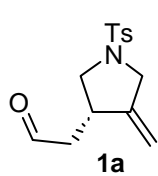

H column, see graph). *R<sub>f</sub>* = 0.17 (silica, EtOAc:hexanes 3:7); [ $\alpha$ ]<sub>D</sub><sup>20</sup> = –43.1 (*c* = 1.86 in CHCl<sub>3</sub>); IR (film):  $\nu_{\text{max}}$  = 2841, 2729, 1721, 1667, 1597, 1494, 1402, 1343, 1304, 1160, 1094, 1044, 901, 816, 709, 663 cm<sup>–1</sup>; <sup>1</sup>H NMR (600 MHz, CDCl<sub>3</sub>):  $\delta$  = 9.75 (s, 1 H),

7.70 (d, *J* = 8.2 Hz, 2 H), 7.34 (d, *J* = 8.5 Hz, 2 H), 4.97 (dd, *J* = 3.9, 1.9 Hz, 1 H), 4.89 (dd, *J* = 4.4, 2.1 Hz, 1 H), 3.87–3.77 (m, 2 H), 3.54 (dd, *J* = 9.7, 7.4 Hz, 1 H), 3.20–2.95 (m, 1 H), 2.91 (dd, *J* = 9.7, 6.5 Hz, 1 H), 2.70 (ddd, *J* = 18.4, 4.9, 0.8 Hz, 1 H), 2.54 (ddd, *J* = 18.4, 8.7, 0.8 Hz, 1 H), 2.44 (s, 3 H) ppm;

$^{13}\text{C}$  NMR (151 MHz,  $\text{CDCl}_3$ ):  $\delta$  = 199.80, 146.70, 143.83, 132.40, 129.74, 127.83, 107.63, 53.25, 51.77, 46.74, 36.72, 21.55 ppm; HRMS ( $m/z$ ):  $[\text{M} + \text{H}]^+$  calcd for  $\text{C}_{14}\text{H}_{18}\text{NO}_3\text{S}^+$  280.1002, found 280.1001.

**2a**: 28.3 mg, 90 %, 97 % ee (chiral HPLC analysis of the corresponding *p*-bromobenzoate ester,<sup>[2]</sup> OD-

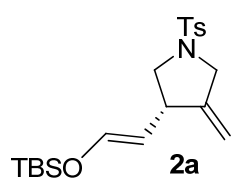

H column, see graph).  $R_f$  = 0.58 (silica, EtOAc:hexanes 3:7);  $[\alpha]_D^{20}$  =  $-28.2$  ( $c$  = 0.57

in  $\text{CHCl}_3$ ); IR (film):  $\nu_{\text{max}}$  = 2930, 2858, 1661, 1598, 1472, 1349, 1305, 1254, 1162,

1095, 1052, 929, 839, 814, 783, 708, 663  $\text{cm}^{-1}$ ;  $^1\text{H}$  NMR (600 MHz,  $\text{CDCl}_3$ ):  $\delta$  =

7.70 (d,  $J$  = 8.2 Hz, 2 H), 7.33 (d,  $J$  = 7.9 Hz, 2 H), 6.28 (d,  $J$  = 12.0 Hz, 1 H), 4.93 (dd,  $J$  = 4.4, 2.1 Hz,

1 H), 4.86 (dd,  $J$  = 4.9, 2.4 Hz, 1 H), 4.63 (dd,  $J$  = 11.9, 9.3 Hz, 1 H), 4.04 (dt,  $J$  = 14.2, 2.9 Hz, 1 H),

3.67–3.59 (m, 2 H), 3.17–3.09 (m, 1 H), 2.66 (t,  $J$  = 9.7 Hz, 1 H), 2.44 (s, 3 H), 0.90 (s, 9 H), 0.13 (s, 6

H) ppm;  $^{13}\text{C}$  NMR (151 MHz,  $\text{CDCl}_3$ ):  $\delta$  = 147.87, 143.62, 143.54, 132.71, 129.67, 127.79, 108.28,

107.74, 54.03, 51.78, 42.52, 25.60, 21.54, 18.33,  $-5.30$ ,  $-5.31$  ppm; HRMS ( $m/z$ ):  $[\text{M} + \text{H}]^+$  calcd for

$\text{C}_{20}\text{H}_{32}\text{NO}_3\text{SSi}^+$  394.1867, found 394.1868.

**4a**: 13.8 mg, 85 %, > 98 % ee (Mosher ester<sup>[2]</sup> analysis, see  $^1\text{H}$  NMR spectrum).  $R_f$  = 0.26 (silica,

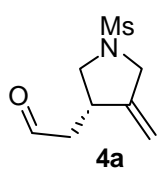

EtOAc:hexanes 1:1);  $[\alpha]_D^{20}$  =  $-28.9$  ( $c$  = 0.45 in  $\text{CHCl}_3$ ); IR (film):  $\nu_{\text{max}}$  = 2933, 1718,

1386, 1325, 1264, 1217, 1148, 1108, 1048, 961, 897, 822, 789, 749, 701, 659  $\text{cm}^{-1}$ ;  $^1\text{H}$

NMR (400 MHz,  $\text{CDCl}_3$ ):  $\delta$  = 9.83–9.81 (m, 1 H), 5.09 (dd,  $J$  = 4.2, 2.0 Hz, 1 H), 5.00

(dd,  $J$  = 4.4, 2.1 Hz, 1 H), 4.00 (dd,  $J$  = 3.6, 2.1 Hz, 2 H), 3.74 (dd,  $J$  = 9.8, 7.5 Hz, 1 H), 3.31–3.22 (m,

1 H), 3.06 (dd,  $J$  = 9.8, 7.0 Hz, 1 H), 2.86 (s, 3 H), 2.86–2.80 (m, 1 H), 2.67 (ddd,  $J$  = 18.5, 8.4, 0.9 Hz,

1 H) ppm;  $^{13}\text{C}$  NMR (125 MHz,  $\text{CDCl}_3$ ):  $\delta$  = 199.73, 146.79, 108.05, 53.24, 51.86, 46.59, 37.30, 35.22

ppm; HRMS ( $m/z$ ):  $[\text{M} + \text{Na}]^+$  calcd for  $\text{C}_8\text{H}_{13}\text{NNaO}_3\text{S}^+$  226.0508, found 226.0501.

**5a**: 15.6 mg, 75 %, 98 % ee (Mosher ester<sup>[2]</sup> analysis, see  $^{19}\text{F}$  NMR spectrum).  $R_f$  = 0.40 (silica,

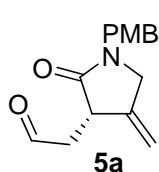

EtOAc:hexanes 3:2);  $[\alpha]_D^{20}$  =  $-29.0$  ( $c$  = 0.10 in  $\text{CHCl}_3$ ); IR (film):  $\nu_{\text{max}}$  = 3275, 2923,

2850, 1721, 1692, 1662, 1610, 1513, 1458, 1442, 1246, 1176, 1110, 1092, 1032, 800

$\text{cm}^{-1}$ ;  $^1\text{H}$  NMR (600 MHz,  $\text{CDCl}_3$ ):  $\delta$  = 9.81 (s, 1 H), 7.19 (d,  $J$  = 8.5 Hz, 2 H), 6.87 (d,

$J$  = 8.6 Hz, 2 H), 5.03–5.01 (m, 1 H), 4.98–4.95 (m, 1 H), 4.47 (dd,  $J$  = 34.5, 14.6 Hz, 2 H), 3.93–3.82

(m, 2 H), 3.80 (s, 3 H), 3.55–3.47 (m, 1 H), 3.10–3.03 (m, 1 H), 2.93 (dd,  $J = 18.4, 6.5$  Hz, 1 H) ppm;  $^{13}\text{C}$  NMR (151 MHz,  $\text{CDCl}_3$ ):  $\delta = 199.50, 173.39, 159.19, 141.18, 129.58, 127.89, 114.12, 108.95, 55.30, 51.09, 45.93, 44.53, 41.11$  ppm; HRMS ( $m/z$ ):  $[\text{M} + \text{H}]^+$  calcd for  $\text{C}_{15}\text{H}_{18}\text{NO}_3^+$  260.1281, found 260.1269.

**6a**: 16.3 mg, 89 %, 93 % ee (chiral HPLC analysis of the corresponding ethylene glycol acetal, OD-H

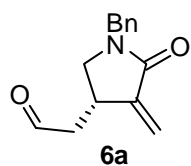

column, see graph).  $R_f = 0.38$  (silica, EtOAc:hexanes 3:2);  $[\alpha]_D^{20} = -68.9$  ( $c = 0.35$  in  $\text{CHCl}_3$ ); IR (film):  $\nu_{\text{max}} = 2923, 2853, 1720, 1685, 1656, 1494, 1440, 1358, 1314, 1198, 1080, 1030, 930, 808, 748, 701$   $\text{cm}^{-1}$ ;  $^1\text{H}$  NMR (600 MHz,  $\text{CDCl}_3$ ):  $\delta = 9.78$  (s,

1 H), 7.35–7.27 (m, 3 H), 7.26–7.22 (m, 2 H), 6.11 (d,  $J = 2.8$  Hz, 1 H), 5.34 (d,  $J = 2.4$  Hz, 1 H), 4.54 (s, 2 H), 3.60 (dd,  $J = 10.3, 8.3$  Hz, 1 H), 3.39–3.33 (m, 1 H), 2.91–2.82 (m, 2 H), 2.63 (dd,  $J = 18.7, 9.3$  Hz, 1 H) ppm;  $^{13}\text{C}$  NMR (151 MHz,  $\text{CDCl}_3$ ):  $\delta = 199.73, 167.00, 142.95, 135.93, 128.77, 128.30, 127.77, 116.25, 50.11, 49.00, 47.09, 29.84$  ppm; HRMS ( $m/z$ ):  $[\text{M} + \text{H}]^+$  calcd for  $\text{C}_{14}\text{H}_{16}\text{NO}_2^+$  230.1175, found 230.1174.

**7a**: 15.0 mg, 78 %, 97 % ee (Mosher ester<sup>[2]</sup> analysis, see  $^{19}\text{F}$  NMR spectrum).  $R_f = 0.34$  (silica,

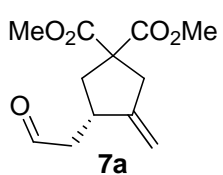

EtOAc:hexanes 3:7);  $[\alpha]_D^{20} = -45.6$  ( $c = 0.75$  in  $\text{CHCl}_3$ ); IR (film):  $\nu_{\text{max}} = 2992, 2956, 2840, 2724, 1730, 1658, 1435, 1255, 1199, 1162, 1071, 1031, 890$   $\text{cm}^{-1}$ ;  $^1\text{H}$  NMR (600 MHz,  $\text{CDCl}_3$ ):  $\delta = 9.80$  (s, 1 H), 5.01–4.98 (m, 1 H), 4.82–4.78 (m, 1 H), 3.74

(s, 3 H), 3.72 (s, 3 H), 3.14–2.92 (m, 3 H), 2.72 (ddd,  $J = 21.2, 15.6, 6.7$  Hz, 2 H), 2.52 (dd,  $J = 17.3, 8.0$  Hz, 1 H), 1.88 (dd,  $J = 13.1, 10.4$  Hz, 1 H) ppm;  $^{13}\text{C}$  NMR (151 MHz,  $\text{CDCl}_3$ ):  $\delta = 201.09, 171.94, 171.89, 150.40, 107.09, 58.30, 52.92, 52.86, 47.95, 40.58, 39.83, 36.44$  ppm; HRMS ( $m/z$ ):  $[\text{M} + \text{H}]^+$  calcd for  $\text{C}_{12}\text{H}_{17}\text{O}_5^+$  241.1070, found 241.1068.

**8a**: 19.9 mg, 84 %, > 98 % ee (Mosher ester<sup>[2]</sup> analysis, see  $^1\text{H}$  NMR spectrum).  $R_f = 0.43$  (silica,

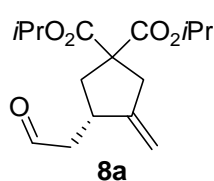

EtOAc:hexanes 3:7);  $[\alpha]_D^{20} = -49.5$  ( $c = 0.96$  in  $\text{CHCl}_3$ ); IR (film):  $\nu_{\text{max}} = 2982, 2931, 1725, 1467, 1375, 1257, 1191, 1106, 893, 827$   $\text{cm}^{-1}$ ;  $^1\text{H}$  NMR (600 MHz,  $\text{CDCl}_3$ ):  $\delta = 9.80$  (s, 1 H), 5.08–4.99 (m, 2 H), 4.98–4.96 (m, 1 H), 4.80–4.77 (m, 1 H), 3.08–

3.04 (m, 1 H), 3.04–2.99 (m, 1 H), 2.91 (ddd,  $J = 16.9, 4.3, 2.1$  Hz, 1 H), 2.73 (ddd,  $J = 17.4, 5.2, 1.6$  Hz, 1 H), 2.63 (ddd,  $J = 12.9, 8.0, 0.7$  Hz, 1 H), 2.52 (ddd,  $J = 17.4, 8.3, 1.8$  Hz, 1H), 1.84 (dd,  $J = 13.1, 10.1$  Hz, 1 H), 1.25–1.20 (m, 12 H) ppm;  $^{13}\text{C}$  NMR (151 MHz,  $\text{CDCl}_3$ ):  $\delta = 201.27, 171.01, 170.99, 150.82, 106.76, 69.01, 68.98, 58.41, 47.96, 40.39, 39.61, 36.49, 21.50$  ppm; HRMS ( $m/z$ ):  $[\text{M} + \text{H}]^+$  calcd for  $\text{C}_{16}\text{H}_{25}\text{O}_5^+$  297.1696, found 297.1695.

**9a:** 29.8 mg, 92 %, 87 % ee (Mosher ester<sup>[2]</sup> analysis, see  $^{19}\text{F}$  NMR spectrum).  $R_f = 0.54$  (silica,  $\text{PhO}_2\text{S}$   $\text{SO}_2\text{Ph}$  EtOAc:hexanes 1:1);  $[\alpha]_D^{20} = -29.1$  ( $c = 0.95$  in  $\text{CHCl}_3$ ); IR (film):  $\nu_{\text{max}} = 3066, 1719, 1663, 1583, 1478, 1447, 1426, 1326, 1308, 1215, 1141, 1075, 1024, 998, 895, 750, 730, 718, 685, 666$   $\text{cm}^{-1}$ ;  $^1\text{H}$  NMR (600 MHz,  $\text{CDCl}_3$ ):  $\delta = 9.78$  (s, 1 H), 8.13–7.98 (m, 4 H), 7.75–7.71 (m, 2 H), 7.64–7.58 (m, 4 H), 4.93–4.89 (d,  $J = 2.1$  Hz, 1 H), 4.77–4.73 (m, 1 H), 3.29 (s, 2 H), 3.24–3.14 (m, 1 H), 2.94 (dd,  $J = 15.1, 8.6$  Hz, 1 H), 2.80 (dd,  $J = 18.1, 4.7$  Hz, 1 H), 2.57 (dd,  $J = 18.1, 8.7$  Hz, 1 H), 2.31 (dd,  $J = 15.1, 10.0$  Hz, 1 H) ppm;  $^{13}\text{C}$  NMR (151 MHz,  $\text{CDCl}_3$ ):  $\delta = 200.13, 148.07, 136.40, 135.81, 134.79, 134.70, 131.27, 131.15, 128.84, 128.77, 107.53, 91.14, 47.48, 38.13, 37.18, 36.85$  ppm; HRMS ( $m/z$ ):  $[\text{M} + \text{H}]^+$  calcd for  $\text{C}_{20}\text{H}_{21}\text{O}_5\text{S}_2^+$  405.0825, found 405.0818.

**10a:** 18.7 mg, 85 %, > 98 % ee (Mosher ester<sup>[2]</sup> analysis, see  $^{19}\text{F}$  NMR spectrum).  $R_f = 0.64$  (silica, EtOAc:hexanes 1:3);  $[\alpha]_D^{20} = -21.7$  ( $c = 0.86$  in  $\text{CHCl}_3$ ); IR (film):  $\nu_{\text{max}} = 3065, 2916, 2721, 1721, 1654, 1476, 1447, 1308, 1219, 1155, 1101, 1031, 1008, 935, 885, 759, 732, 666$   $\text{cm}^{-1}$ ;  $^1\text{H}$  NMR (400 MHz,  $\text{CDCl}_3$ ):  $\delta = 9.88$  (t,  $J = 1.7$  Hz, 1 H), 7.75–7.68 (m, 2 H), 7.50 (d,  $J = 7.5$  Hz, 1 H), 7.45–7.41 (m, 1 H), 7.39–7.25 (m, 4 H), 5.16 (dd,  $J = 4.1, 2.2$  Hz, 1 H), 5.08 (dd,  $J = 4.3, 2.3$  Hz, 1 H), 3.65–3.55 (m, 1 H), 3.07 (ddd,  $J = 16.2, 4.9, 2.4$  Hz, 1 H), 2.98 (ddd,  $J = 17.2, 5.1, 1.7$  Hz, 1 H), 2.79–2.73 (m, 1 H), 2.73–2.64 (m, 1 H), 2.27 (ddd,  $J = 13.0, 8.2, 1.4$  Hz, 1 H), 2.08 (dd,  $J = 13.0, 10.7$  Hz, 1 H) ppm;  $^{13}\text{C}$  NMR (125 MHz,  $\text{CDCl}_3$ ):  $\delta = 201.55, 154.33, 152.81, 150.99, 140.02, 139.42, 127.62, 127.58, 127.38, 127.31, 123.22, 122.66, 119.92, 119.86, 107.52, 55.61, 49.55, 45.86, 45.18, 37.87$  ppm; GC/MS ( $m/z$ ):  $[\text{M}]^+$  calcd for  $\text{C}_{20}\text{H}_{18}\text{O}^+$  274, found 274.

**11a:** 20.7 mg, 92 %, > 99 % ee (chiral HPLC analysis of the corresponding ethylene glycol acetal, OD-

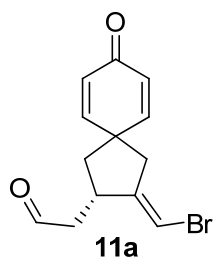

H column, see graph).  $R_f = 0.09$  (silica, EtOAc:hexanes 3:7);  $[\alpha]_D^{20} = -95.0$  ( $c = 0.28$  in  $\text{CHCl}_3$ ); IR (film):  $\nu_{\text{max}} = 3073, 2916, 2850, 2724, 1720, 1662, 1623, 1407, 1256, 1183, 1016, 860 \text{ cm}^{-1}$ ;  $^1\text{H}$  NMR (600 MHz,  $\text{CDCl}_3$ ):  $\delta = 9.82$  (s, 1 H), 6.96 (dd,  $J = 10.1, 3.0 \text{ Hz}$ , 1 H), 6.78 (dd,  $J = 9.9, 3.0 \text{ Hz}$ , 1H), 6.33–6.23 (m, 2 H), 6.11 (dd,  $J = 5.0, 2.4 \text{ Hz}$ , 1 H), 3.39–3.32 (m, 1 H), 2.90 (dd,  $J = 18.3, 5.3 \text{ Hz}$ , 1 H), 2.70 (dd,  $J = 17.9, 7.0 \text{ Hz}$ , 1 H), 2.67–2.59 (m, 2 H), 2.21 (ddd,  $J = 12.8, 7.4, 1.5 \text{ Hz}$ , 1 H), 1.80 (dd,  $J = 12.7, 11.4 \text{ Hz}$ , 1 H) ppm;  $^{13}\text{C}$  NMR (151 MHz,  $\text{CDCl}_3$ ):  $\delta = 199.64, 185.64, 153.59, 151.14, 148.14, 129.31, 127.88, 101.25, 48.61, 46.17, 44.58, 44.13, 37.02 \text{ ppm}$ ; HRMS ( $m/z$ ):  $[\text{M} + \text{H}]^+$  calcd for  $\text{C}_{13}\text{H}_{14}\text{BrO}_2^+$  280.0172, found 280.0172.

**12a:** 22.2 mg, 93 %, > 98 % ee (Mosher ester<sup>[2]</sup> analysis, see  $^1\text{H}$  NMR spectrum).  $R_f = 0.36$  (silica,

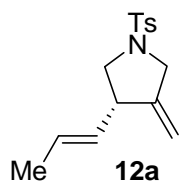

EtOAc:hexanes 1:4);  $[\alpha]_D^{20} = -31.1$  ( $c = 1.13$  in  $\text{CHCl}_3$ ); IR (film):  $\nu_{\text{max}} = 2920, 2855, 1665, 1597, 1494, 1450, 1380, 1345, 1306, 1290, 1215, 1159, 1093, 1049, 1017, 997, 965, 896, 813, 708, 661 \text{ cm}^{-1}$ ;  $^1\text{H}$  NMR (500 MHz,  $\text{CDCl}_3$ ):  $\delta = 7.70$  (d,  $J = 8.3 \text{ Hz}$ , 2 H), 7.33 (d,  $J = 7.9 \text{ Hz}$ , 2 H), 5.52 (dq,  $J = 15.1, 6.5, 0.7 \text{ Hz}$ , 1 H), 5.10 (dddd,  $J = 15.2, 8.2, 3.2, 1.6 \text{ Hz}$ , 1 H), 4.95–4.92 (m, 1 H), 4.85–4.82 (m, 1 H), 3.99 (ddd,  $J = 14.1, 3.4, 2.2 \text{ Hz}$ , 1H), 3.69 (ddd,  $J = 14.1, 4.1, 2.0 \text{ Hz}$ , 1H), 3.59 (dd,  $J = 9.4, 7.9 \text{ Hz}$ , 1H), 3.22–3.14 (m, 1 H), 2.79 (t,  $J = 9.3 \text{ Hz}$ , 1H), 2.44 (s, 3H), 1.65 (dd,  $J = 6.5, 1.6 \text{ Hz}$ , 3H) ppm;  $^{13}\text{C}$  NMR (151 MHz,  $\text{CDCl}_3$ ):  $\delta = 147.39, 143.62, 132.76, 129.67, 129.16, 128.24, 127.81, 107.80, 53.52, 51.86, 46.76, 21.55, 17.88 \text{ ppm}$ ; HRMS ( $m/z$ ):  $[\text{M} + \text{H}]^+$  calcd for  $\text{C}_{15}\text{H}_{20}\text{NO}_2\text{S}^+$  278.1209, found 278.1207.

**13a:** 27.0 mg, 83 %, 94 % ee (chiral HPLC analysis of the corresponding *p*-bromobenzoate ester,<sup>[2]</sup> OD-

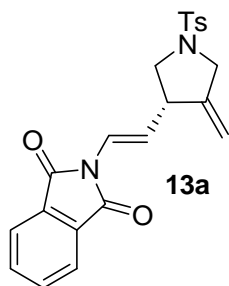

H column, see graph).  $R_f = 0.50$  (silica, EtOAc:hexanes 1:1);  $[\alpha]_D^{20} = -65.9$  ( $c = 0.39$  in  $\text{CHCl}_3$ ); IR (film):  $\nu_{\text{max}} = 2923, 2850, 1781, 1719, 1663, 1597, 1468, 1383, 1346, 1306, 1162, 1094, 1048, 957, 884, 816, 716, 663 \text{ cm}^{-1}$ ;  $^1\text{H}$  NMR (600 MHz,  $\text{CDCl}_3$ ):  $\delta = 7.89\text{--}7.84$  (m, 2 H), 7.77–7.74 (m, 2 H), 7.72 (d,  $J = 8.2 \text{ Hz}$ , 2 H), 7.35 (d,  $J = 8.0 \text{ Hz}$ , 2 H), 6.69 (d,  $J = 14.6 \text{ Hz}$ , 1 H), 6.32 (dd,  $J = 14.7, 9.0 \text{ Hz}$ , 1 H), 5.04–5.01 (m, 1 H), 4.94–4.91

(m, 1 H), 4.11–4.05 (m, 1 H), 3.76–3.70 (m, 2 H), 3.35–3.28 (m, 1 H), 2.88 (t,  $J = 9.5$  Hz, 1 H), 2.44 (s, 3 H) ppm;  $^{13}\text{C}$  NMR (151 MHz,  $\text{CDCl}_3$ ):  $\delta = 166.30, 146.47, 143.83, 134.58, 132.52, 131.48, 129.79, 127.83, 123.68, 120.41, 118.15, 108.94, 53.63, 51.88, 45.69, 21.55$  ppm; HRMS ( $m/z$ ):  $[\text{M} + \text{Na}]^+$  calcd for  $\text{C}_{22}\text{H}_{20}\text{N}_2\text{NaO}_4\text{S}^+$  431.1036, found 431.1034.

**Conversion of diene 12a to the corresponding Mosher ester.** To a stirred solution of diene **12a** (5.5 mg, 0.02 mmol) and NMO (2.8 mg, 0.024 mmol) in acetone/water (4:1, 0.5 mL) was added  $\text{K}_2\text{OsO}_4 \cdot 2\text{H}_2\text{O}$  (1.5 mg, 0.004 mmol) at 23 °C. The resulting mixture was stirred at that temperature for 4 h before it was quenched with saturated aq.  $\text{Na}_2\text{S}_2\text{O}_4$  solution (2 mL). The mixture was extracted with EtOAc ( $5 \times 2$  mL), and the combined organic phase was dried over  $\text{MgSO}_4$ . After filtration and evaporation of the solvent, the residue was dissolved in EtOH/water (1:1, 0.5 mL). To the resulting solution was added  $\text{NaIO}_4$  (12.8 mg, 0.06 mmol) in one portion at 0 °C. The reaction mixture was stirred at that temperature for 5 min before  $\text{NaBH}_4$  (2.3 mg, 0.06 mmol) was added. The resulting mixture was stirred at 0 °C for 15 min before it was quenched with saturated aq.  $\text{NH}_4\text{Cl}$  solution (2 mL). After extraction with EtOAc ( $5 \times 2$  mL), the combined organic phase was dried over  $\text{MgSO}_4$  and filtered. The solvent was evaporated and the resulting crude alcohol was subjected to Mosher ester formation according to the general procedure.<sup>[2]</sup>

**Conversion of imide 13a to the corresponding *p*-bromobenzoate ester.** To a vial containing imide **13a** (8.2 mg, 0.02 mmol) in THF (0.3 mL) was added aq. HCl solution (3.0 M, 0.3 mL). The vial was sealed and heated at 85 °C for 5 h before the reaction was quenched with saturated aq.  $\text{NaHCO}_3$  solution (2 mL). The resulting mixture was extracted with EtOAc ( $5 \times 2$  mL), and the combined organic phase was dried over  $\text{MgSO}_4$ . After filtration and evaporation of the solvent, the residue was dissolved in EtOH (0.5 mL). To the resulting solution was added  $\text{NaBH}_4$  (1.1 mg, 0.03 mmol) at 0 °C and the mixture was stirred at that temperature for 15 min before it was quenched with saturated aq.  $\text{NaHCO}_3$  solution (1 mL). The resulting mixture was extracted with EtOAc ( $5 \times 2$  mL), and the combined organic phase was dried over  $\text{MgSO}_4$ . After filtration and evaporation of the solvent, the resulting crude alcohol was subjected to *p*-bromobenzoate ester formation according to the general procedure.<sup>[2]</sup>

***p*-Bromophenyl carbamate **1b**:** To a stirred solution of aldehyde **1a** (10.0 mg, 0.0358 mmol) in ethanol (0.30 mL) at 0 °C was added NaBH<sub>4</sub> (2.0 mg, 0.0537 mmol). The resulting mixture was stirred at 0 °C

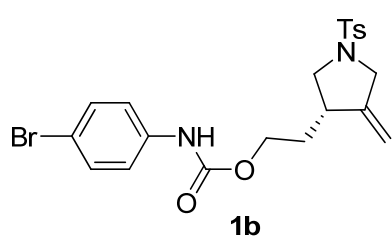

for 15 min before saturated aq. NaHCO<sub>3</sub> solution (1 mL) was slowly added. The mixture was diluted with brine (1 mL) and extracted with EtOAc (5 × 2 mL). The combined organic phase was dried over MgSO<sub>4</sub> and filtered. After removal of the solvent under vacuum, the

residue was purified by column chromatography with EtOAc/hexanes (2:1), giving the corresponding alcohol as a colorless oil. To a stirred solution of this alcohol in CH<sub>2</sub>Cl<sub>2</sub> (0.20 mL) at 0 °C was sequentially added Et<sub>3</sub>N (3.5 mg, 0.0346 mmol) and *p*-bromophenyl isocyanate (6.8 mg, 0.0343 mmol), and the resulting mixture was stirred for 1 h at 0 °C before it was quenched with saturated aq. NaHCO<sub>3</sub> solution (1.0 mL). The resulting mixture was extracted with EtOAc (5 × 2 mL), and the combined organic phase was dried over MgSO<sub>4</sub>. After filtration and evaporation of the solvent, the residue was purified by flash column chromatography with EtOAc/hexanes (1:3), giving carbamate **1b** as a white amorphous solid (12.4 mg, 72 % overall). **1b**: R<sub>f</sub> = 0.23 (silica, EtOAc:hexanes 3:7); [α]<sub>D</sub><sup>20</sup> = −30.2 (*c* = 0.42 in CHCl<sub>3</sub>); IR (film): ν<sub>max</sub> = 3340, 2956, 2924, 2850, 1731, 1594, 1532, 1491, 1400, 1342, 1307, 1219, 1160, 1094, 1075, 1008, 898, 817, 768, 708, 664 cm<sup>−1</sup>; <sup>1</sup>H NMR (600 MHz, CDCl<sub>3</sub>): δ = 7.69 (d, *J* = 8.1 Hz, 2 H), 7.42 (d, *J* = 8.8 Hz, 2 H), 7.34–7.28 (d, *J* = 8.2 Hz, 4 H), 6.82–6.69 (br, 1 H), 4.98 (d, *J* = 1.9 Hz, 1 H), 4.92 (d, *J* = 2.1 Hz, 1 H), 4.22–4.14 (m, 2 H), 3.88–3.76 (m, 2 H), 3.45 (dd, *J* = 9.4, 7.3 Hz, 1 H), 3.03 (dd, *J* = 9.2, 6.3 Hz, 1 H), 2.78–2.69 (m, 1 H), 2.42 (s, 3 H), 1.93 (dt, *J* = 20.9, 6.2 Hz, 1 H), 1.67 (ddt, *J* = 14.7, 8.6, 6.1 Hz, 2 H) ppm; <sup>13</sup>C NMR (151 MHz, CDCl<sub>3</sub>): δ = 153.09, 146.99, 143.79, 136.90, 132.55, 132.01, 129.73, 127.77, 120.15, 116.00, 107.56, 63.14, 53.22, 51.83, 40.15, 31.45, 21.55 ppm; HRMS (*m/z*): [M + H]<sup>+</sup> calcd for C<sub>21</sub>H<sub>24</sub>BrN<sub>2</sub>O<sub>4</sub>S 479.0635, found 479.0630.

**Enone **15**:** To a stirred solution of β-ethoxy enone **14** (3.80 g, 10.48 mmol) in THF (30 mL) was added DIBAL-H (12.0 mL, 1.0 M in hexanes) at −78 °C. The resulting solution was warmed up to −20 °C over a period of 30 min before aq. HCl solution (2.0 M, 30 mL) was slowly added. The mixture was stirred at 0 °C for 30 min and then quickly extracted with EtOAc (3 × 50 mL). The combined organic

phase was washed with saturated aq. NaHCO<sub>3</sub> solution (2 × 20 mL) and dried over MgSO<sub>4</sub>. After

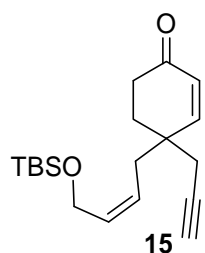

filtration and evaporation of the solvent, the residue was purified by flash column chromatography with EtOAc/hexanes (1:8–1:4), giving enone **15** as a pale yellow oil

(2.94 g, 88 %). **15**:  $R_f$  = 0.41 (silica, EtOAc:hexanes 3:7); IR (film):  $\nu_{\max}$  = 3310, 2953,

2929, 2856, 1680, 1471, 1463, 1388, 1361, 1252, 1168, 1081, 1005, 938, 834, 774,

663 cm<sup>-1</sup>; <sup>1</sup>H NMR (600 MHz, CDCl<sub>3</sub>):  $\delta$  = 6.80 (d,  $J$  = 10.2 Hz, 1 H), 6.01 (d,  $J$  = 10.2 Hz, 1 H), 5.79–

5.72 (m, 1 H), 5.49–5.42 (m, 1 H), 4.26 (dd,  $J$  = 6.2, 1.0 Hz, 2 H), 2.49–2.45 (m, 2H), 2.44–2.30 (m,

4H), 2.09 (t,  $J$  = 2.6 Hz, 1 H), 2.06–1.96 (m, 2 H), 0.92 (s, 9 H), 0.09 (s, 6 H) ppm; <sup>13</sup>C NMR (125 MHz,

CDCl<sub>3</sub>):  $\delta$  = 198.68, 155.34, 133.85, 129.13, 124.32, 80.07, 71.50, 59.23, 38.72, 35.08, 33.85, 31.12,

27.72, 25.90, 18.31, –5.17 ppm; HRMS ( $m/z$ ): [M + H]<sup>+</sup> calcd for C<sub>19</sub>H<sub>31</sub>O<sub>2</sub>Si<sup>+</sup> 319.2088, found

319.2086.

**Bis-enone alcohol 16:** To a stirred solution of enone **15** (2.94 g, 9.23 mmol) and Et<sub>3</sub>N (1.40 g, 13.85

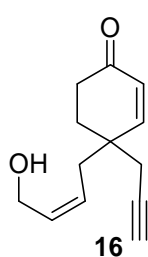

mmol) in CH<sub>2</sub>Cl<sub>2</sub> (20 mL) was slowly added TMSOTf (2.27 g, 10.2 mmol) at 0 °C. After

stirring for 30 min at that temperature, the reaction mixture was quenched with saturated

aq. NaHCO<sub>3</sub> solution (100 mL). The resulting mixture was extracted with ether (3 × 100

mL) and the combined organic phase was washed with brine (50 mL) and dried over

MgSO<sub>4</sub>. After filtration and evaporation of the solvent, a solution of IBX (3.07 g, 11.0 mmol) and MPO

(1.38 g, 11.0 mmol) in DMSO (18 mL) was slowly added to the residue, and the mixture was stirred for

1 h at 23 °C before it was quenched with saturated aq. NaHCO<sub>3</sub> solution (100 mL). The resulting

mixture was extracted with EtOAc (3 × 100 mL). The combined organic phase was dried over MgSO<sub>4</sub>

and filtered. After removal of the solvent under vacuum, the residue was purified by flash column

chromatography with EtOAc/hexanes (1:6–1:3), giving the TBS bis-enone as a pale yellow oil. This

compound was dissolved in THF (20 mL), and to this solution was added aq. HCl solution (1.0 M, 20

mL) at 0 °C. The resulting mixture was vigorously stirred at 0 °C for 1 h before it was quenched with

saturated aq. NaHCO<sub>3</sub> solution (30 mL). After extraction with EtOAc (3 × 50 mL), the combined

organic phase was dried over MgSO<sub>4</sub>, filtered, and evaporated under vacuum. The residue was purified

by flash column chromatography with EtOAc/hexanes (1:1), giving enone alcohol **16** as a colorless oil (1.27 g, 68 % over three steps). **16**:  $R_f = 0.11$  (silica, EtOAc:hexanes 1:1); IR (film):  $\nu_{\max} = 3417, 3920, 3019, 2908, 2860, 1658, 1619, 1429, 1405, 1262, 1176, 1102, 1013, 858, 769, 728, 708 \text{ cm}^{-1}$ ;  $^1\text{H}$  NMR (500 MHz,  $\text{CDCl}_3$ ):  $\delta = 6.87\text{--}6.79$  (m, 2 H),  $6.34\text{--}6.27$  (m, 2 H),  $5.73\text{--}5.65$  (m, 1 H),  $5.32\text{--}5.24$  (m, 1 H),  $4.18\text{--}4.10$  (m, 2 H),  $2.54\text{--}2.49$  (m, 2 H),  $2.43$  (d,  $J = 2.7 \text{ Hz}$ , 2 H),  $2.12$  (t,  $J = 2.7 \text{ Hz}$ , 1 H),  $2.11$  (br, 1 H) ppm;  $^{13}\text{C}$  NMR (125 MHz,  $\text{CDCl}_3$ ):  $\delta = 185.75, 152.23, 132.68, 130.16, 124.94, 78.50, 72.37, 58.13, 43.96, 35.07, 28.20$  ppm; HRMS ( $m/z$ ):  $[\text{M} + \text{H}]^+$  calcd for  $\text{C}_{13}\text{H}_{14}\text{NaO}_2^+$  225.0886, found 225.0893.

**Bis-enone aldehyde 17**: To a flame-dried flask containing enyne **16** (1.27 g, 6.28 mmol) under argon

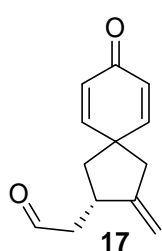

was quickly added  $[\text{Rh}((S)\text{-BINAP})]\text{SbF}_6$  solution prepared freshly as described above (7.85 mL, 0.04 M in DCE). The resulting solution was stirred under argon at  $23^\circ\text{C}$  for 12 h before the solvent was removed under vacuum. The residue was purified by flash column chromatography with EtOAc/hexanes (1:2), giving bis-enone aldehyde **17** as a pale yellow oil (1.09 g, 86 %, > 99 % ee, chiral HPLC analysis of the corresponding ethylene glycol acetal, OD-H column, see graph). **17**:  $R_f = 0.31$  (silica, EtOAc/hexane 1:1);  $[\alpha]_{\text{D}}^{20} = -68.4$  ( $c = 0.75$  in  $\text{CHCl}_3$ ); IR (film):  $\nu_{\max} = 2831, 2725, 1718, 1657, 1621, 1406, 1284, 1259, 1180, 1090, 1059, 1023, 888, 858, 706 \text{ cm}^{-1}$ ;  $^1\text{H}$  NMR (600 MHz,  $\text{CDCl}_3$ ):  $\delta = 9.83$  (t,  $J = 1.3 \text{ Hz}$ , 1 H),  $6.98\text{--}6.95$  (m, 1 H),  $6.79\text{--}6.76$  (m, 1 H),  $6.27\text{--}6.23$  (m, 2 H),  $5.11\text{--}5.09$  (m, 1 H),  $4.99\text{--}4.97$  (m, 1 H),  $3.31\text{--}3.23$  (m, 1 H),  $2.85$  (ddd,  $J = 17.9, 4.9, 1.2 \text{ Hz}$ , 1 H),  $2.68$  (dq,  $J = 16.0, 2.4 \text{ Hz}$ , 1 H),  $2.64$  (ddd,  $J = 17.8, 8.3, 1.4 \text{ Hz}$ , 1 H),  $2.47$  (dd,  $J = 16.0, 1.6 \text{ Hz}$ , 1 H),  $2.15$  (ddd,  $J = 13.0, 8.0, 1.6 \text{ Hz}$ , 1 H),  $1.69$  (dd,  $J = 13.0, 10.3 \text{ Hz}$ , 1 H) ppm;  $^{13}\text{C}$  NMR (125 MHz,  $\text{CDCl}_3$ ):  $\delta = 200.5, 185.8, 154.2, 152.1, 151.2, 128.7, 127.7, 108.5, 49.2, 46.8, 44.4, 43.7, 36.2$  ppm; HRMS ( $m/z$ ):  $[\text{M} + \text{H}]^+$  calcd for  $\text{C}_{13}\text{H}_{15}\text{O}_2$   $[\text{M} + \text{H}]^+$ : 203.1067; found 203.1067.

## References

- [1] P. A. Wender, L. J. Haustedt, J. A. Love, T. J. Williams, J. Y. Yoon, *J. Am. Chem. Soc.* **2006**, *128*, 6302–6303.

- [2] General procedure for the preparation of Mosher esters: To a stirred solution of the alcohol (0.02 mmol) derived from the corresponding aldehyde in CH<sub>2</sub>Cl<sub>2</sub> (0.20 mL) at 0 °C was sequentially added DMAP (0.2 mg, 0.002 mmol), Et<sub>3</sub>N (4.0 mg, 0.04 mmol) and Mosher acid chloride (7.6 mg, 0.03 mmol). After stirring at 0 °C for 30 min, the reaction mixture was directly purified by flash column chromatography with EtOAc/hexanes (1:6–1:3). Longer reaction times (i. e. 1 h) had no effect on the *de* value of the resulting Mosher ester, confirming that there was no kinetic resolution of the 30 min period. *p*-Bromobenzoate esters were also prepared in this procedure using *p*-bromobenzoyl chloride as acylating reagent.

# $^1\text{H}$ and $^{13}\text{C}$ NMR spectra

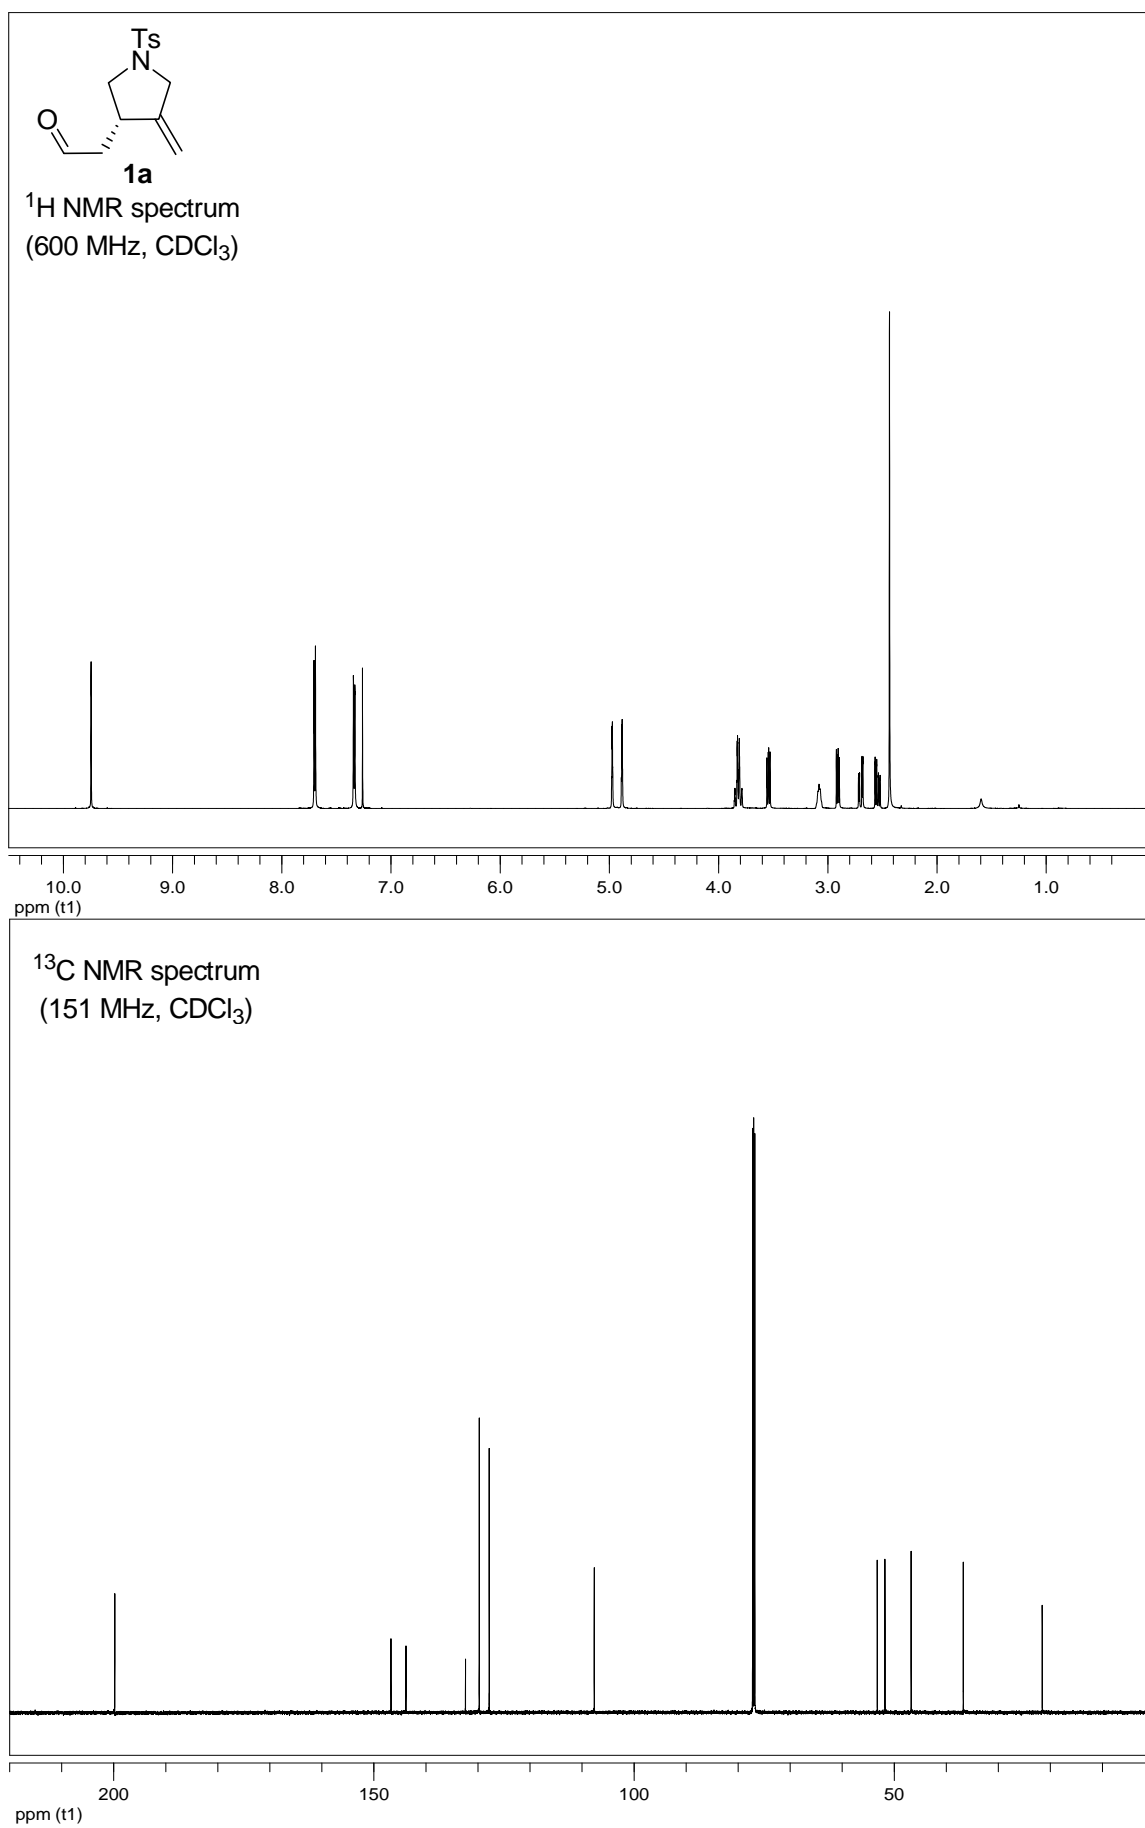

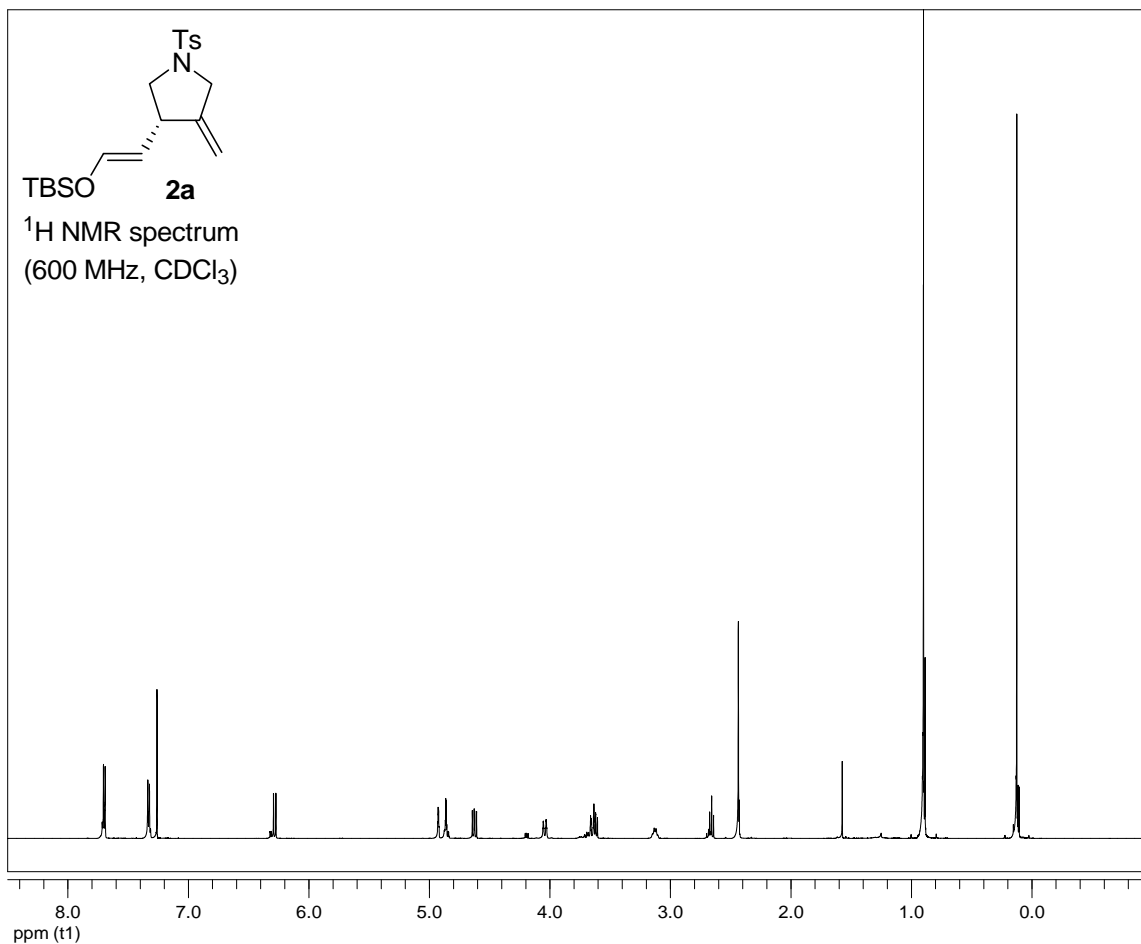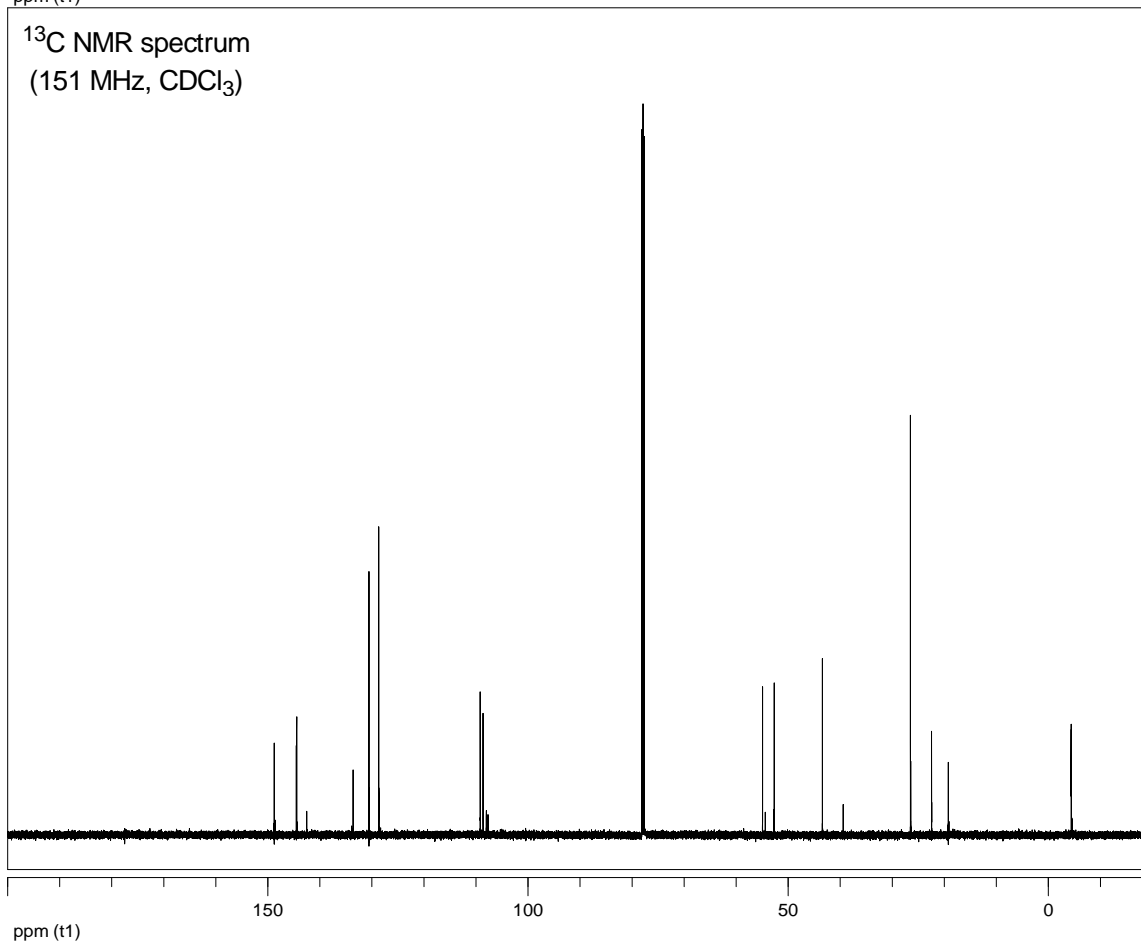

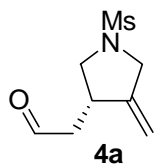

$^1\text{H}$  NMR spectrum  
(400 MHz,  $\text{CDCl}_3$ )

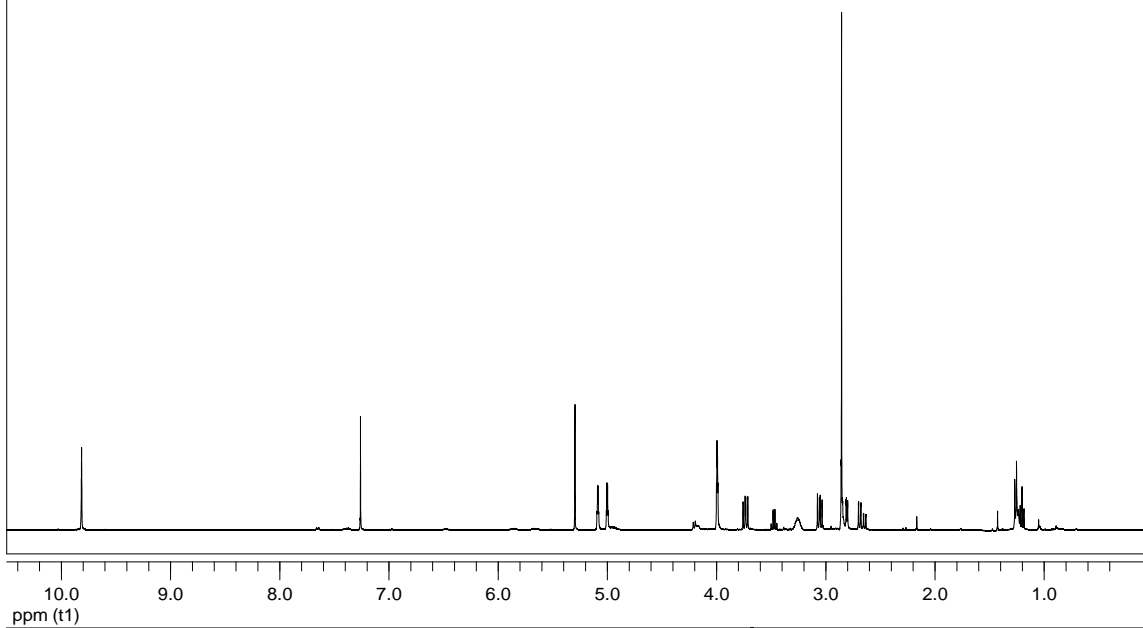

$^{13}\text{C}$  NMR spectrum  
(125 MHz,  $\text{CDCl}_3$ )

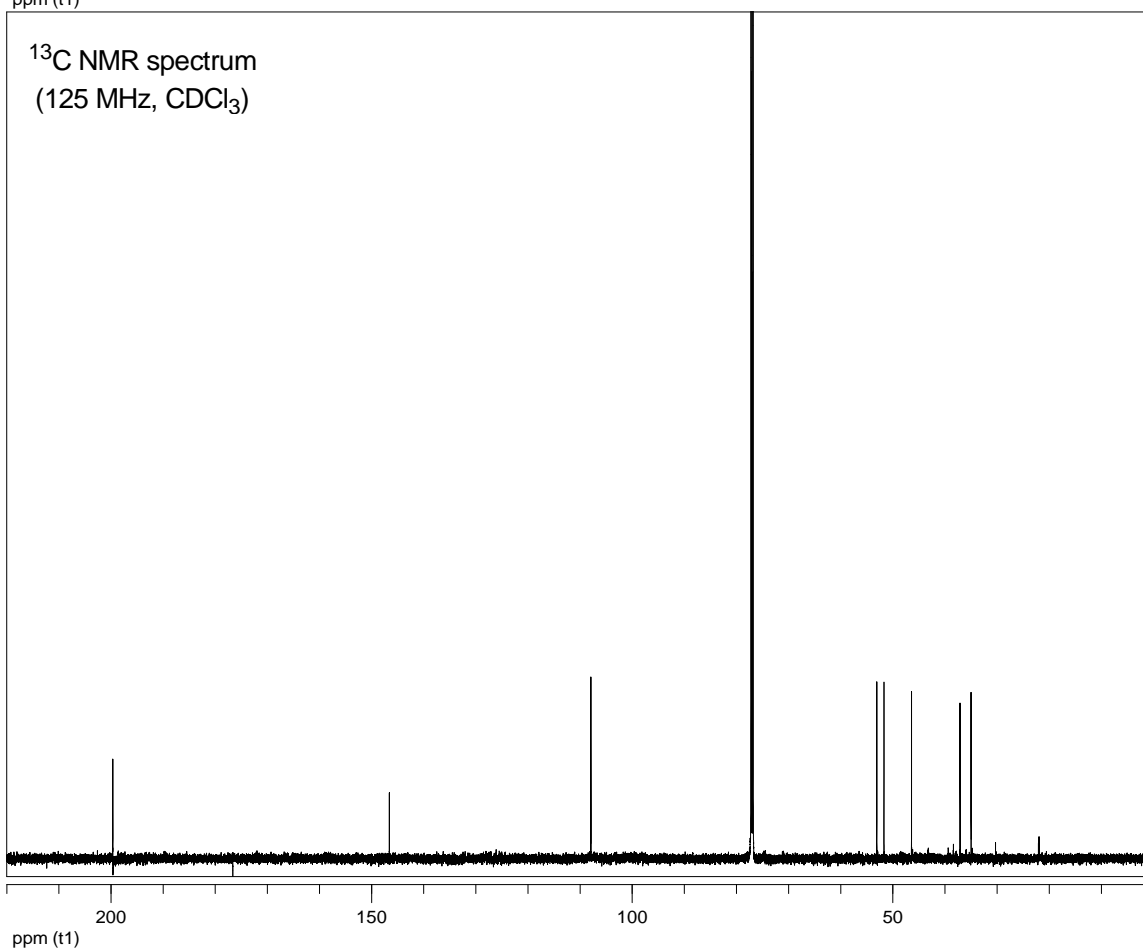

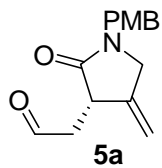

$^1\text{H}$  NMR spectrum  
(600 MHz,  $\text{CDCl}_3$ )

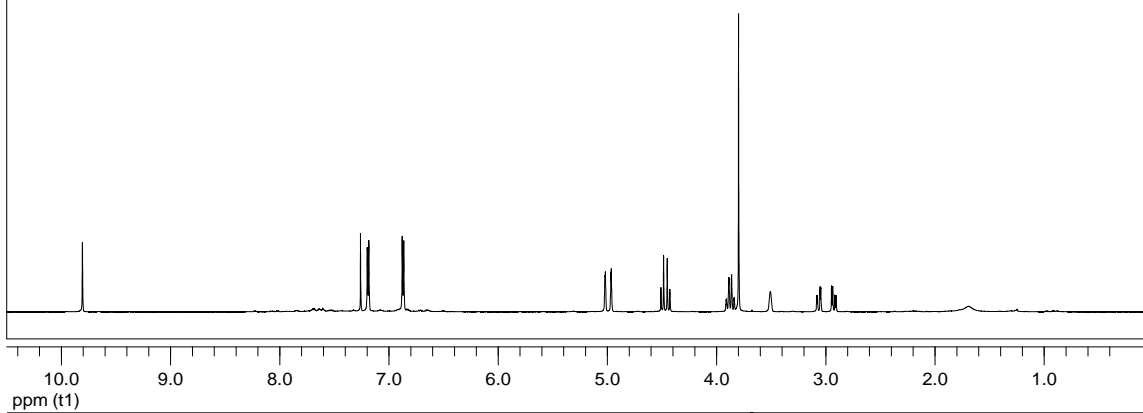

$^{13}\text{C}$  NMR spectrum  
(151 MHz,  $\text{CDCl}_3$ )

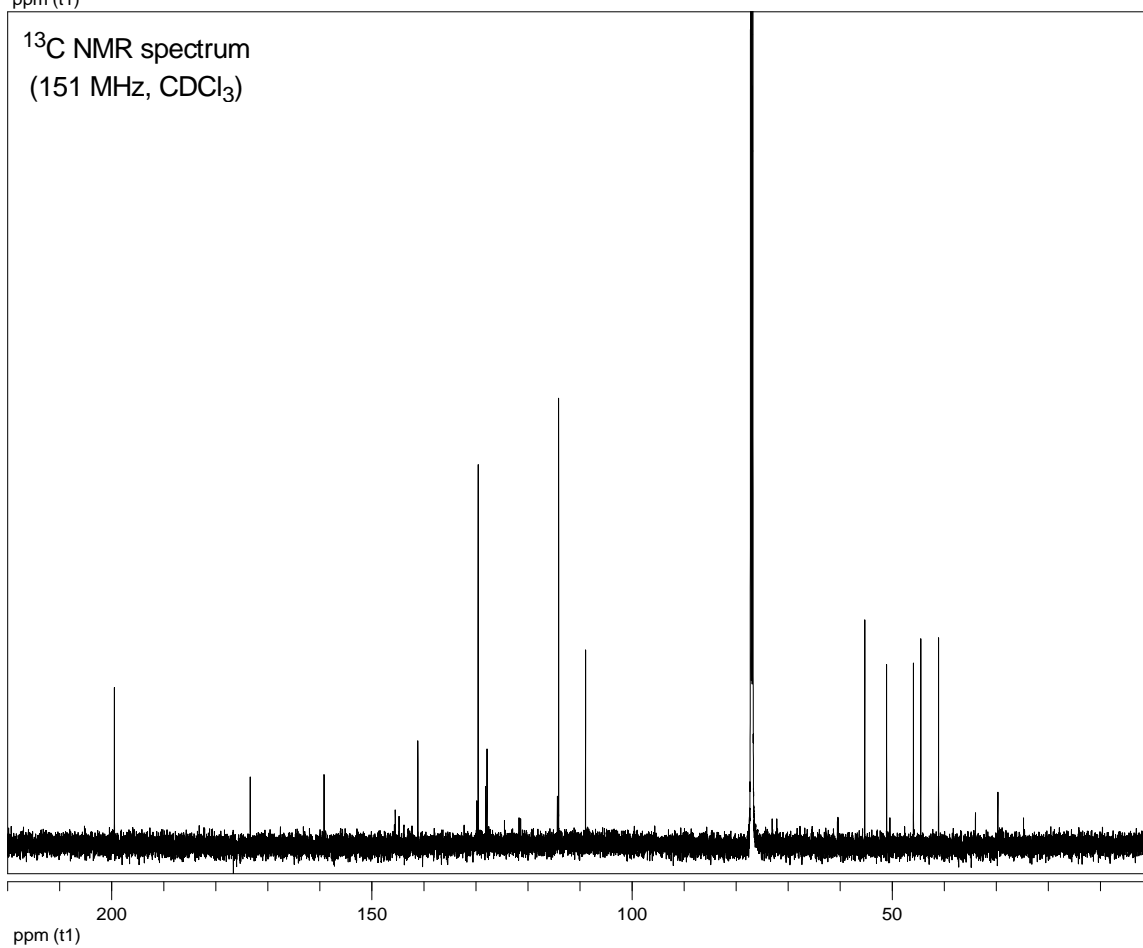

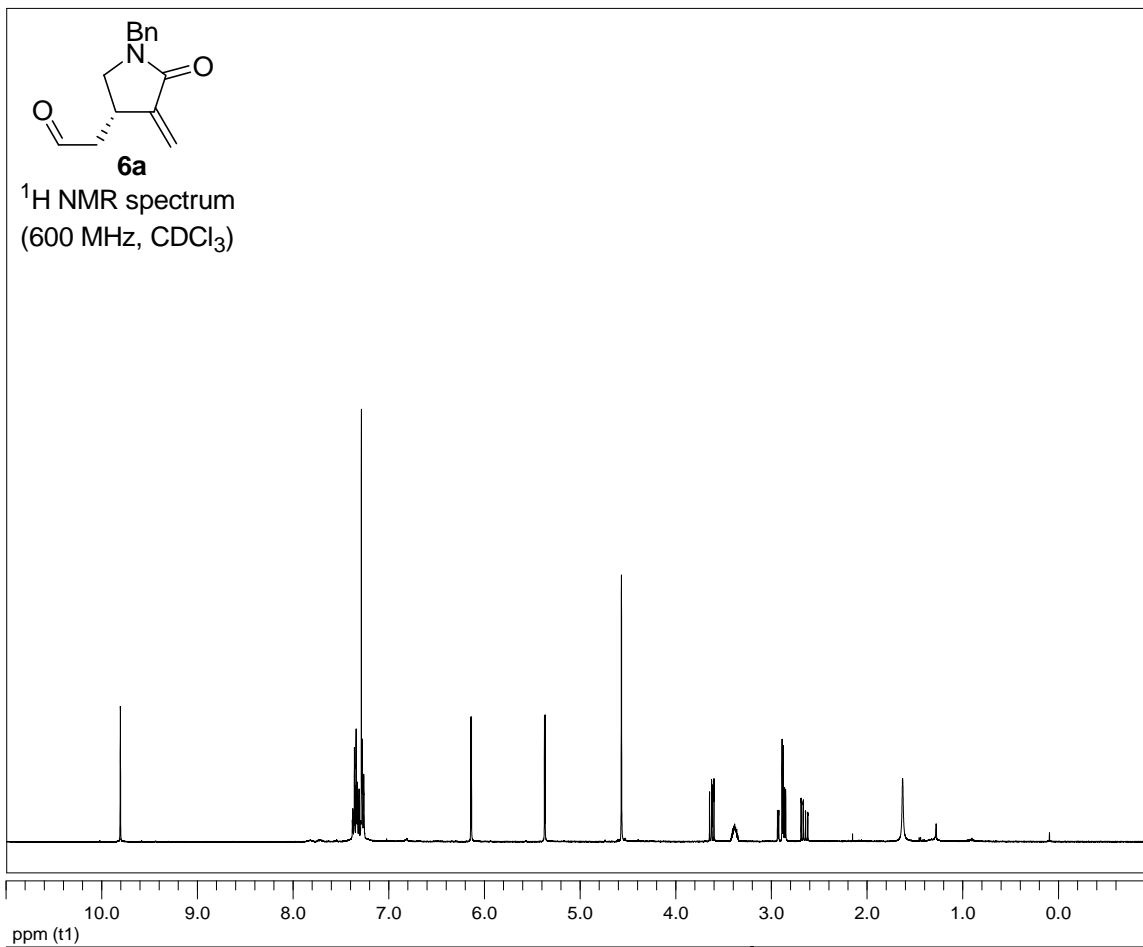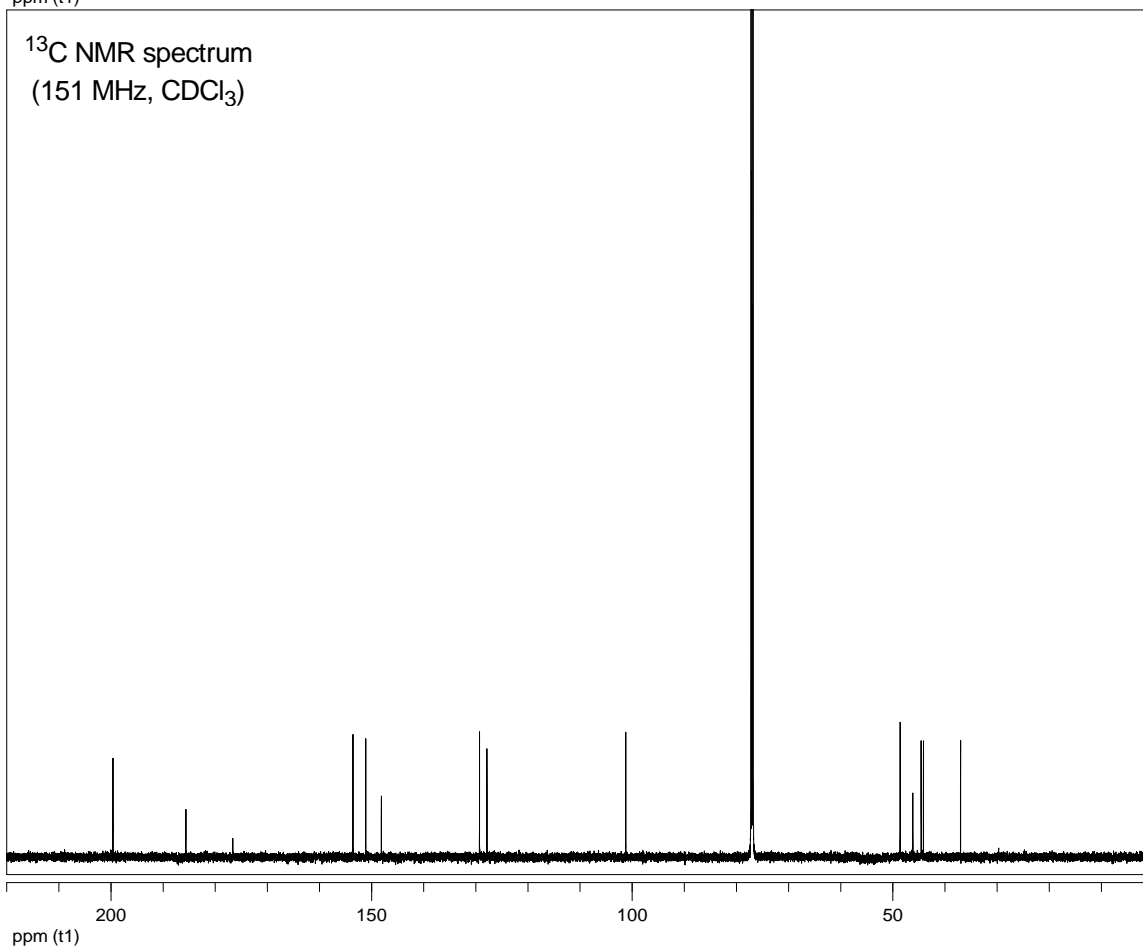

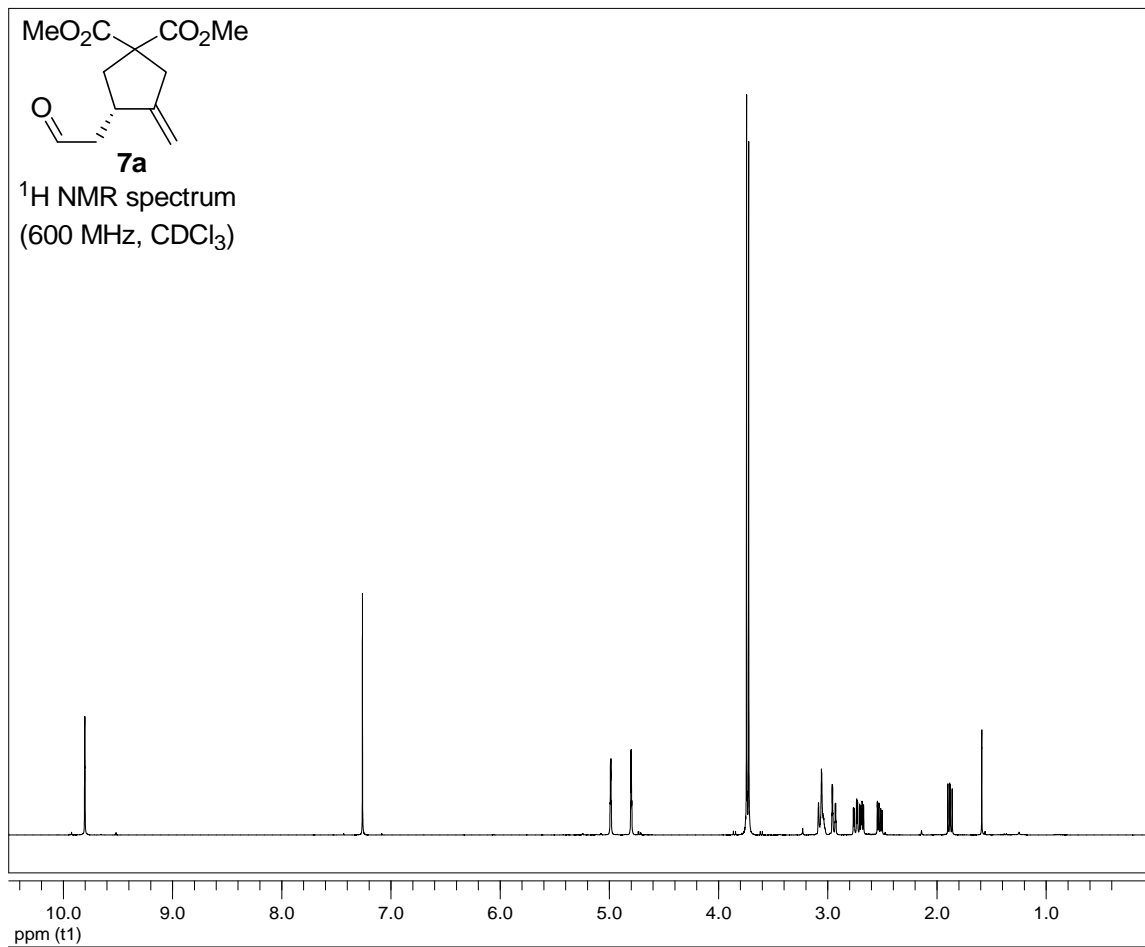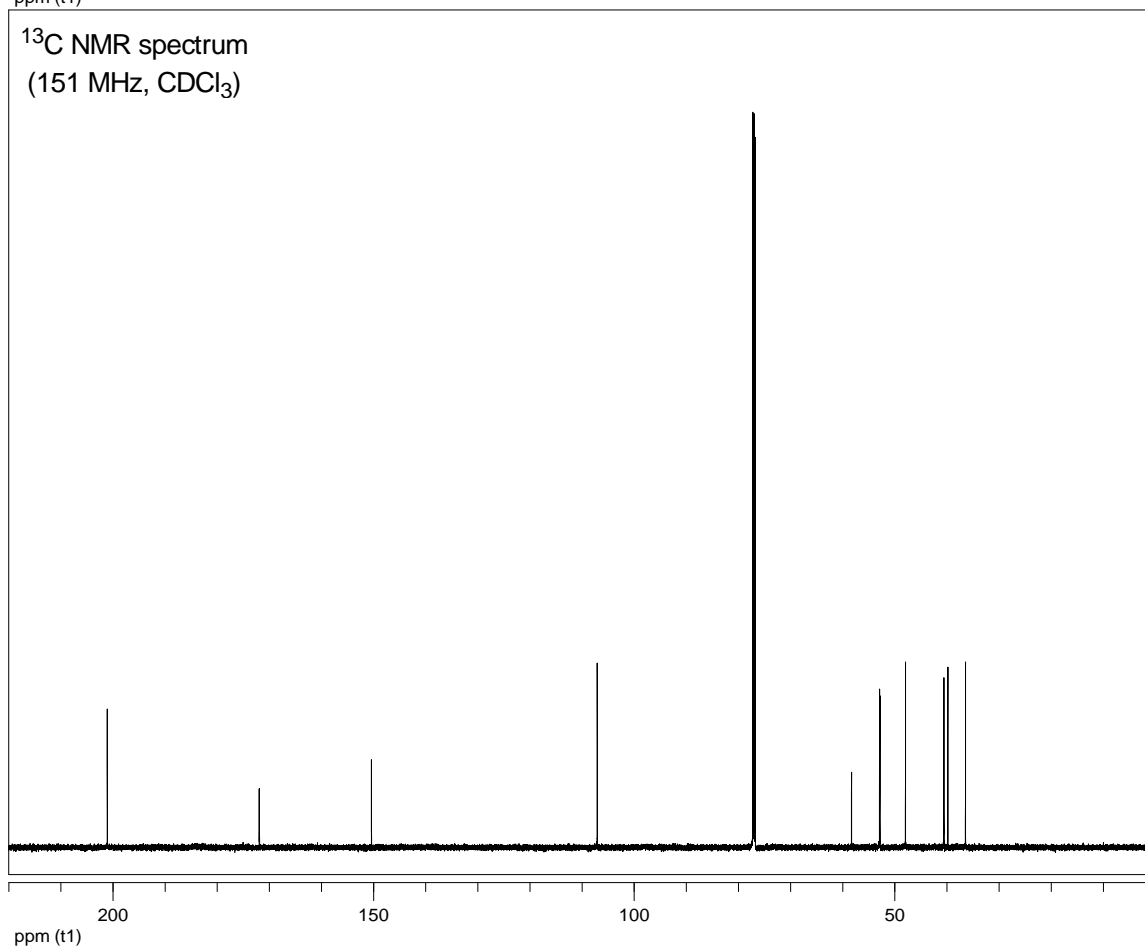

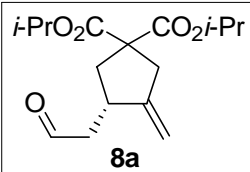

$^1\text{H}$  NMR spectrum  
(600 MHz,  $\text{CDCl}_3$ )

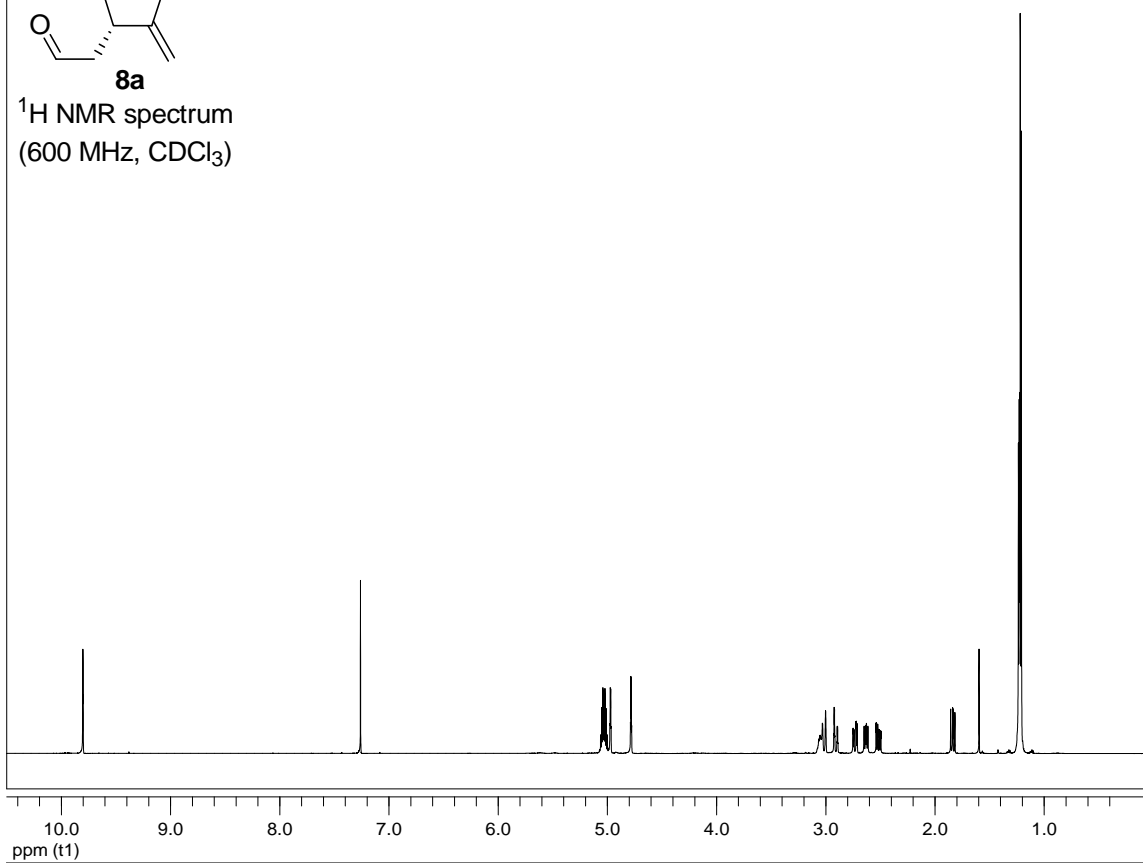

$^{13}\text{C}$  NMR spectrum  
(151 MHz,  $\text{CDCl}_3$ )

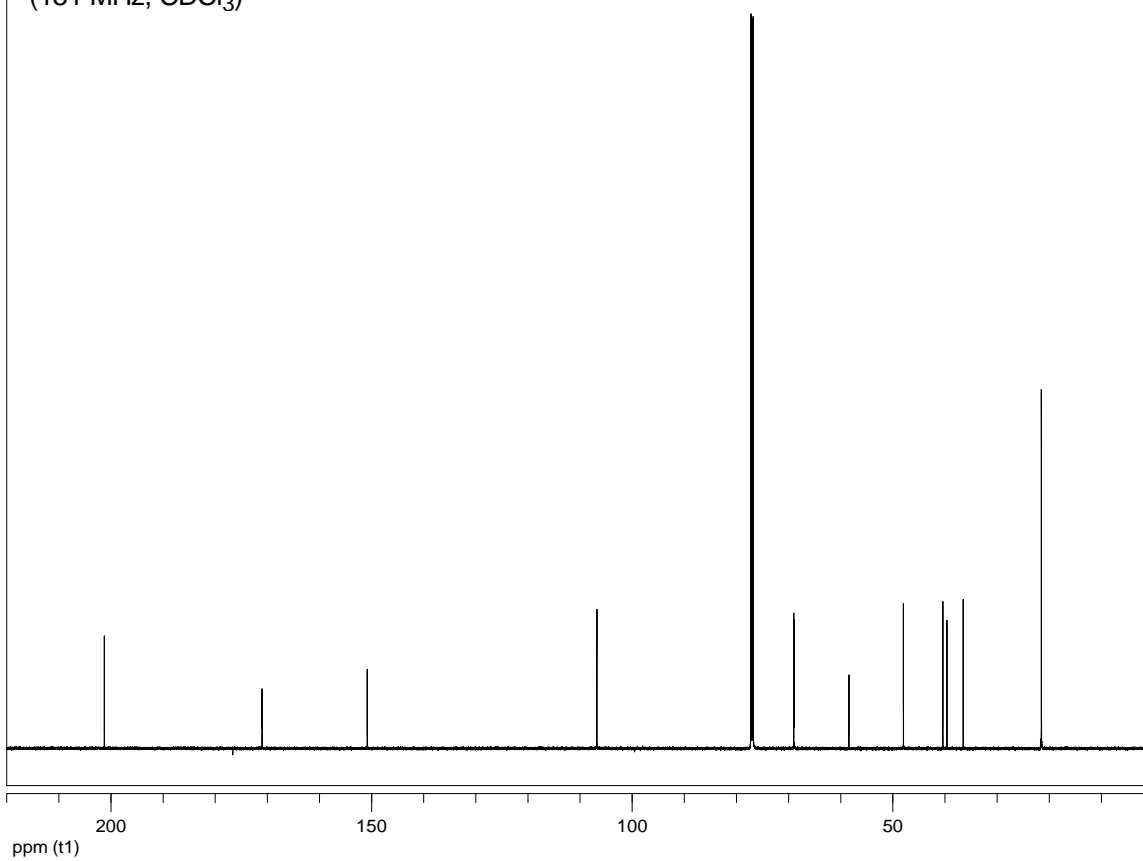

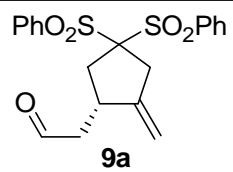

<sup>1</sup>H NMR spectrum  
(600 MHz, CDCl<sub>3</sub>)

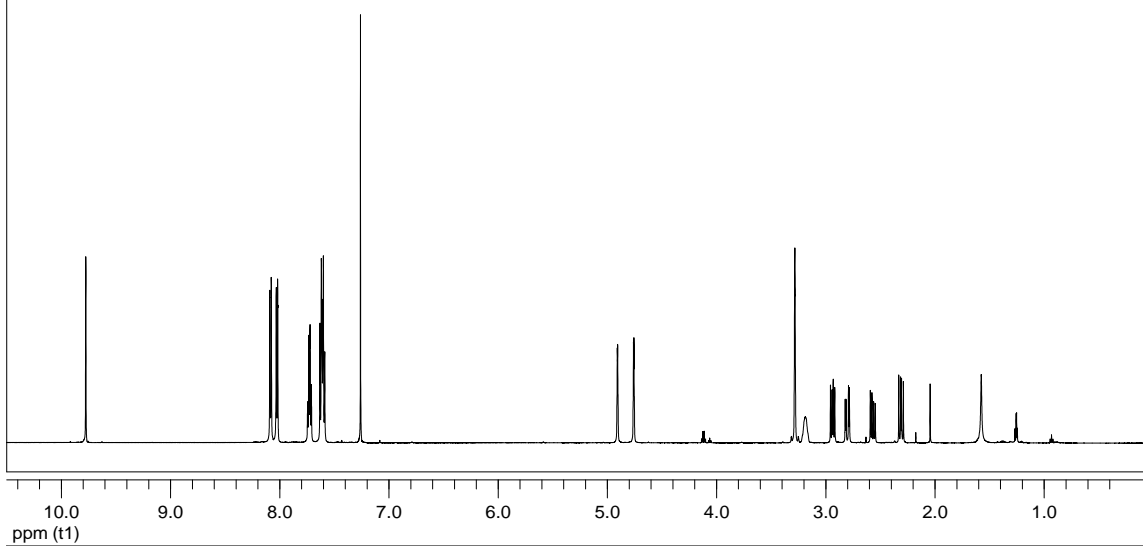

<sup>13</sup>C NMR spectrum  
(151 MHz, CDCl<sub>3</sub>)

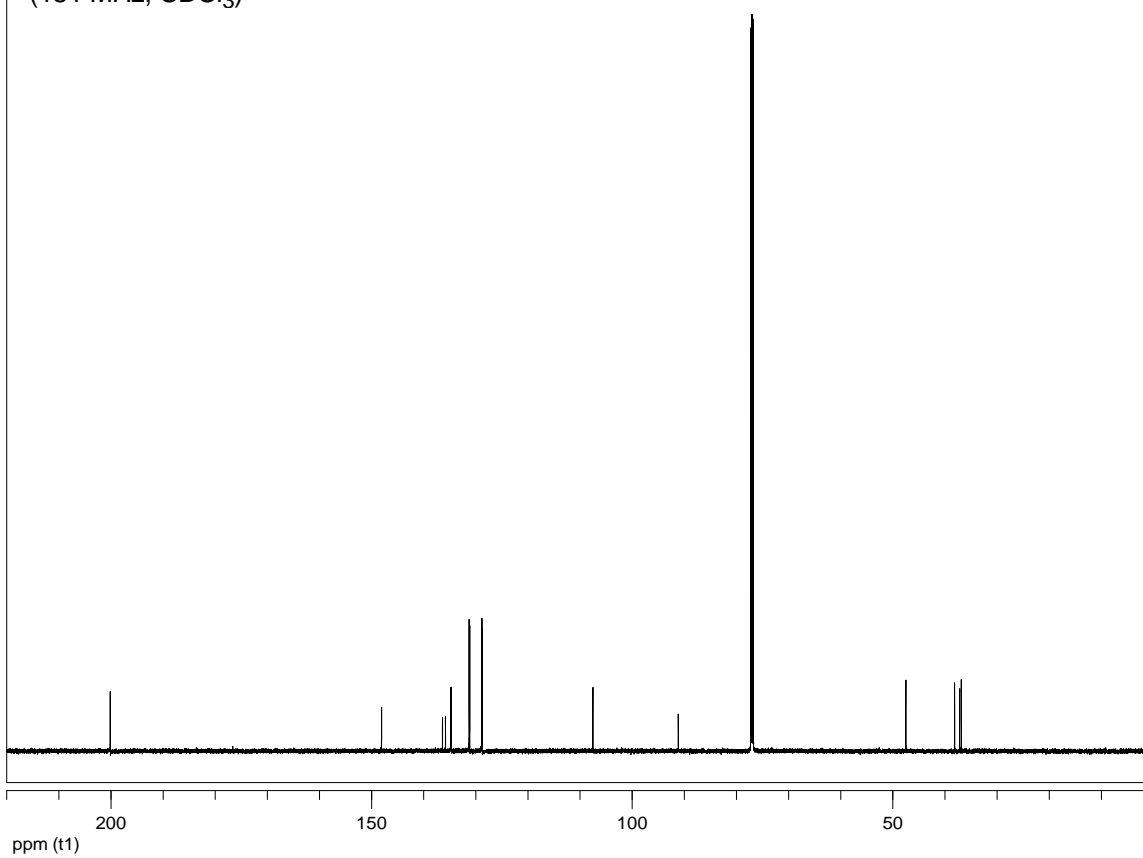

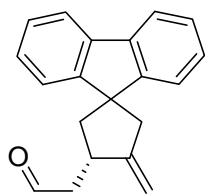

**10a**

$^1\text{H}$  NMR spectrum  
(400 MHz,  $\text{CDCl}_3$ )

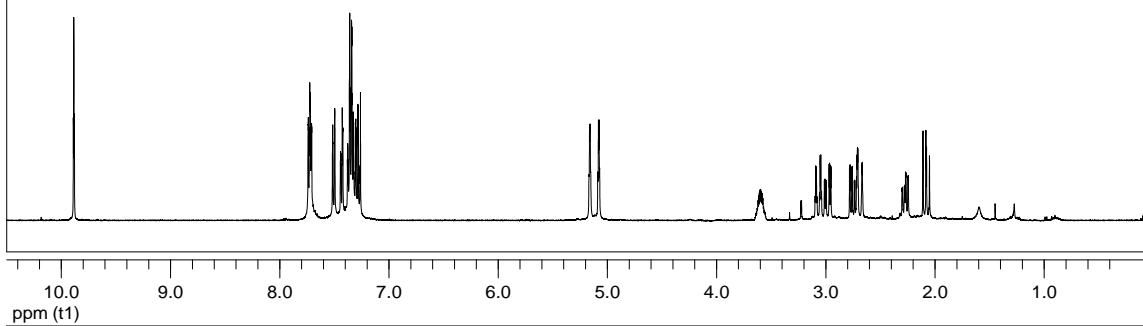

$^{13}\text{C}$  NMR spectrum  
(125 MHz,  $\text{CDCl}_3$ )

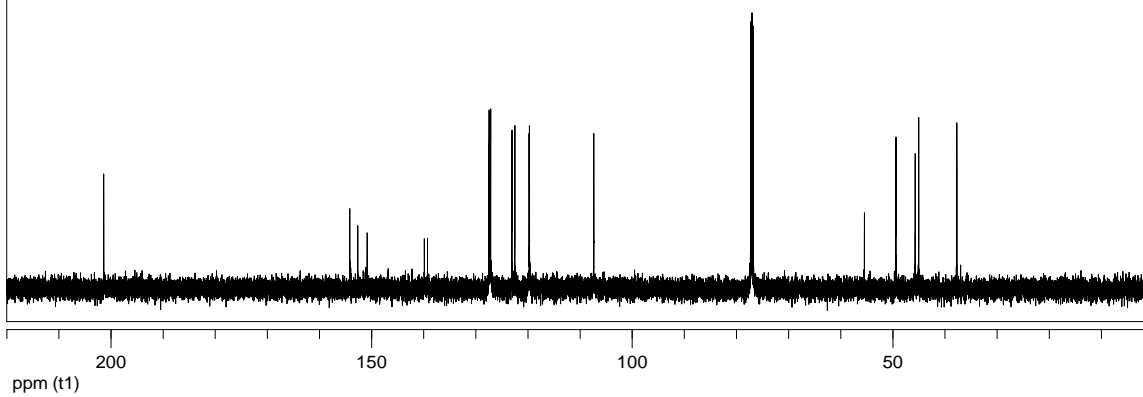

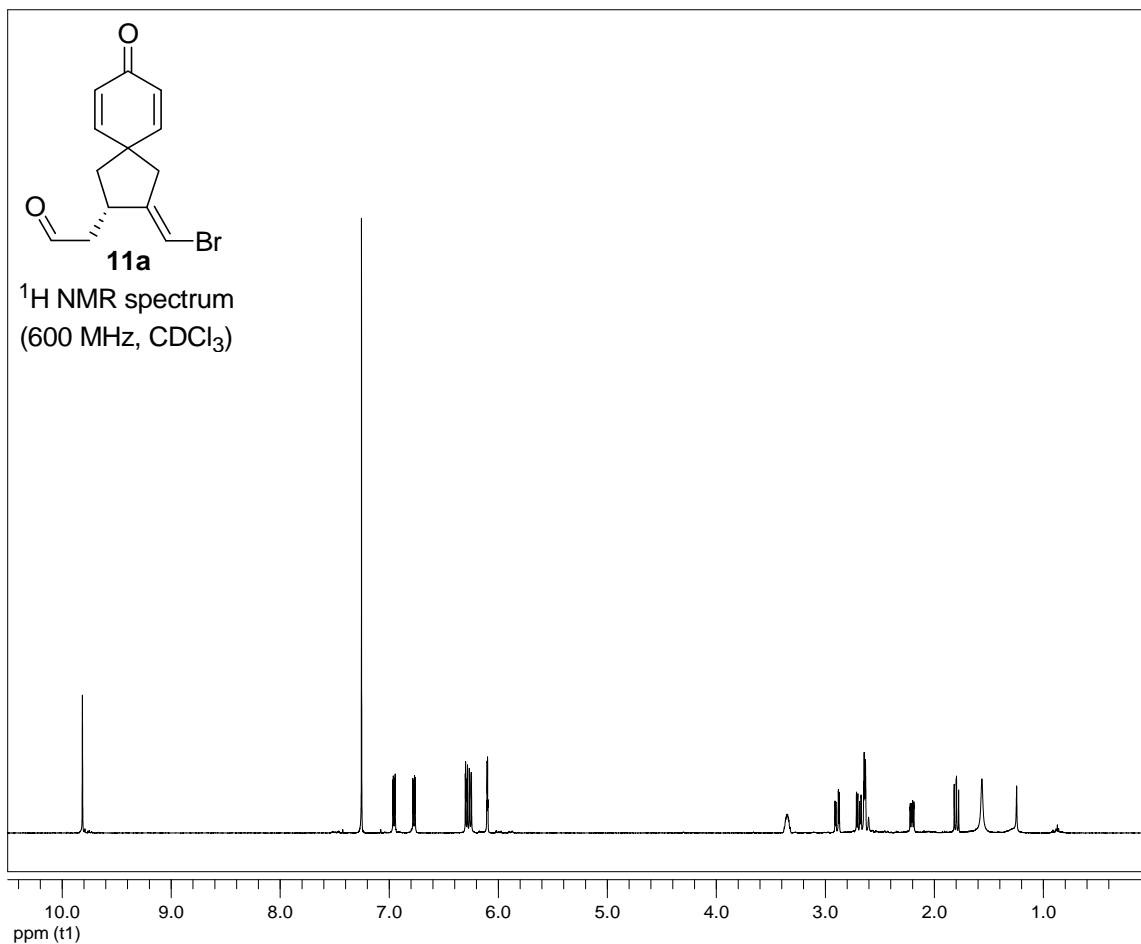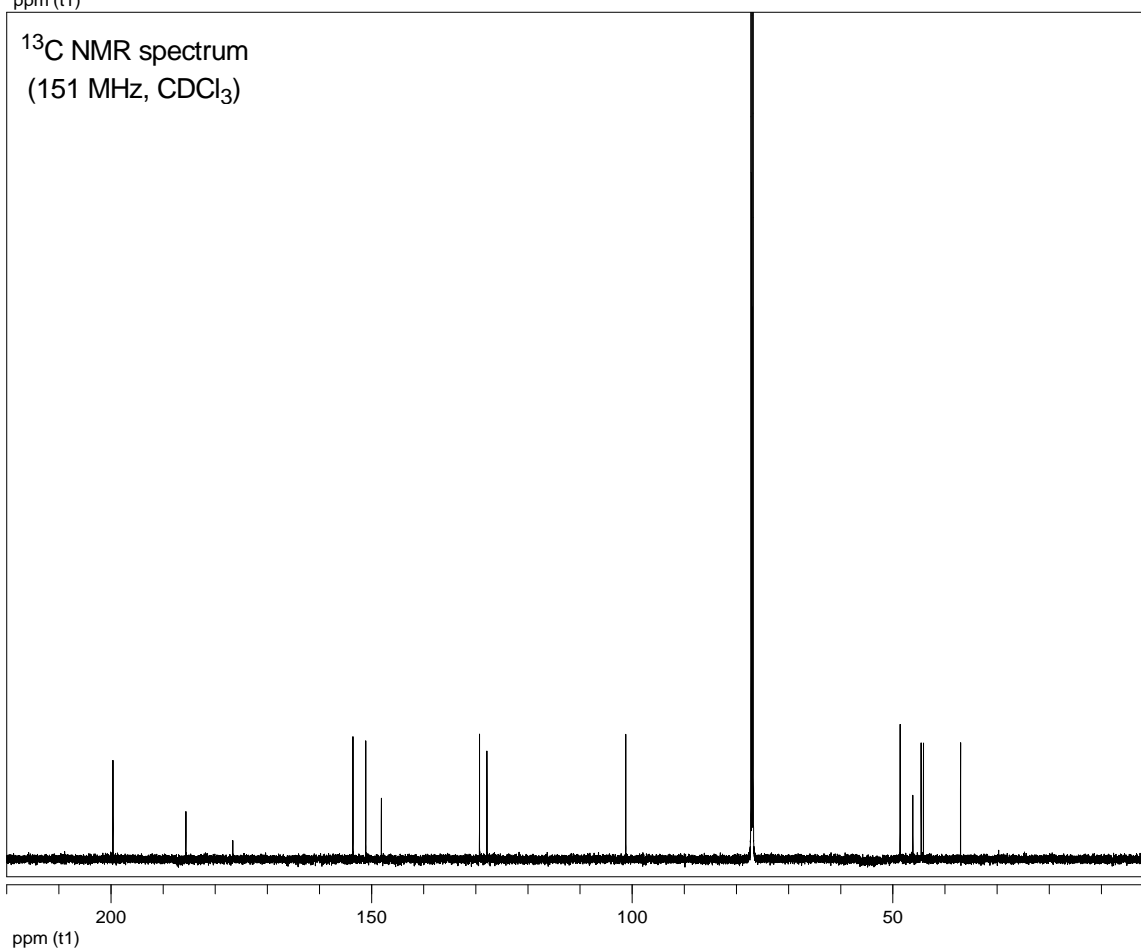

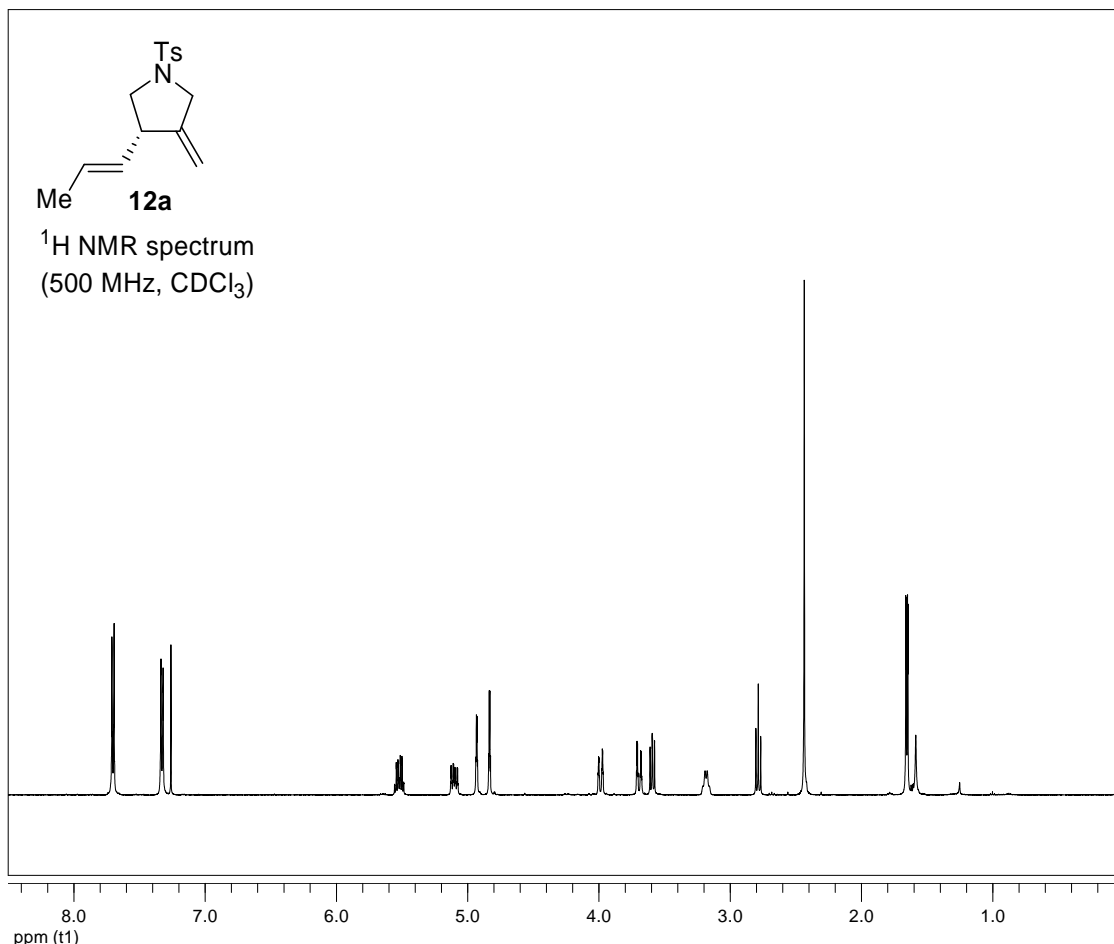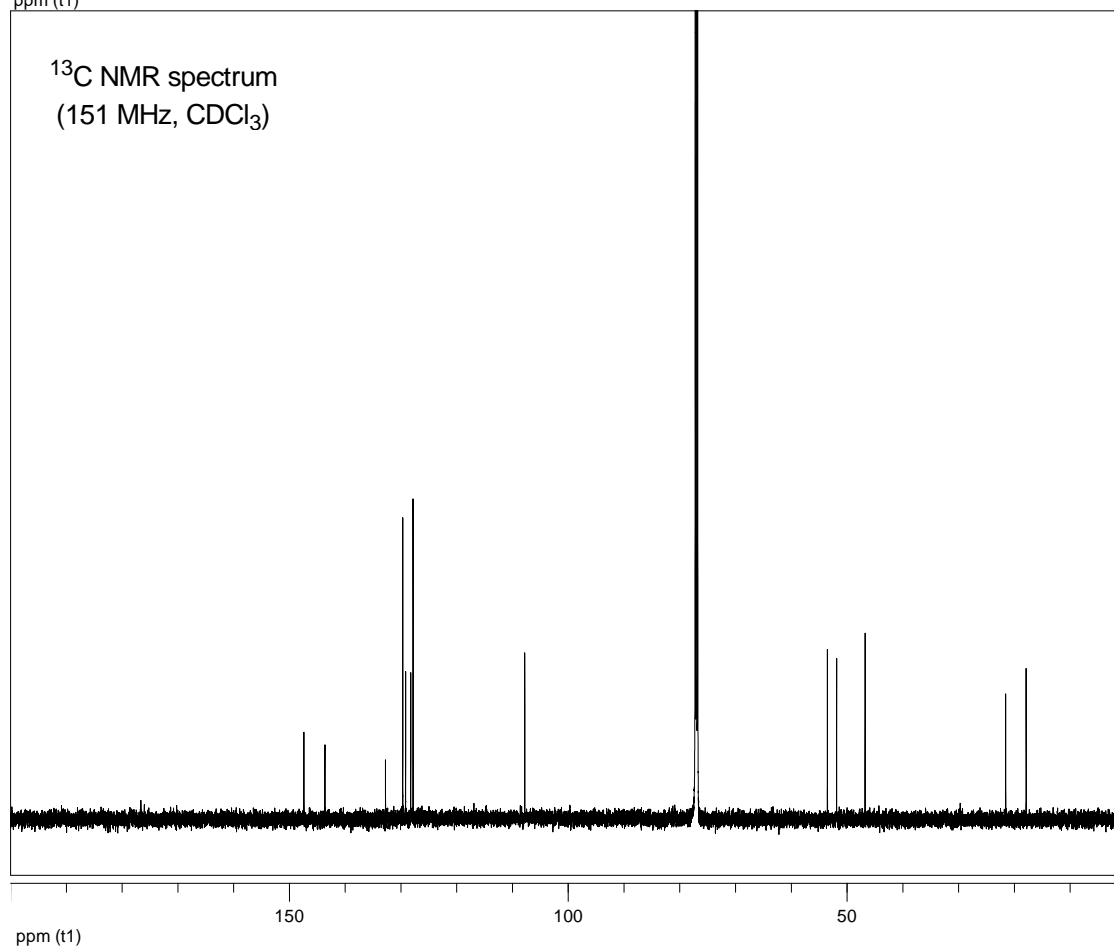

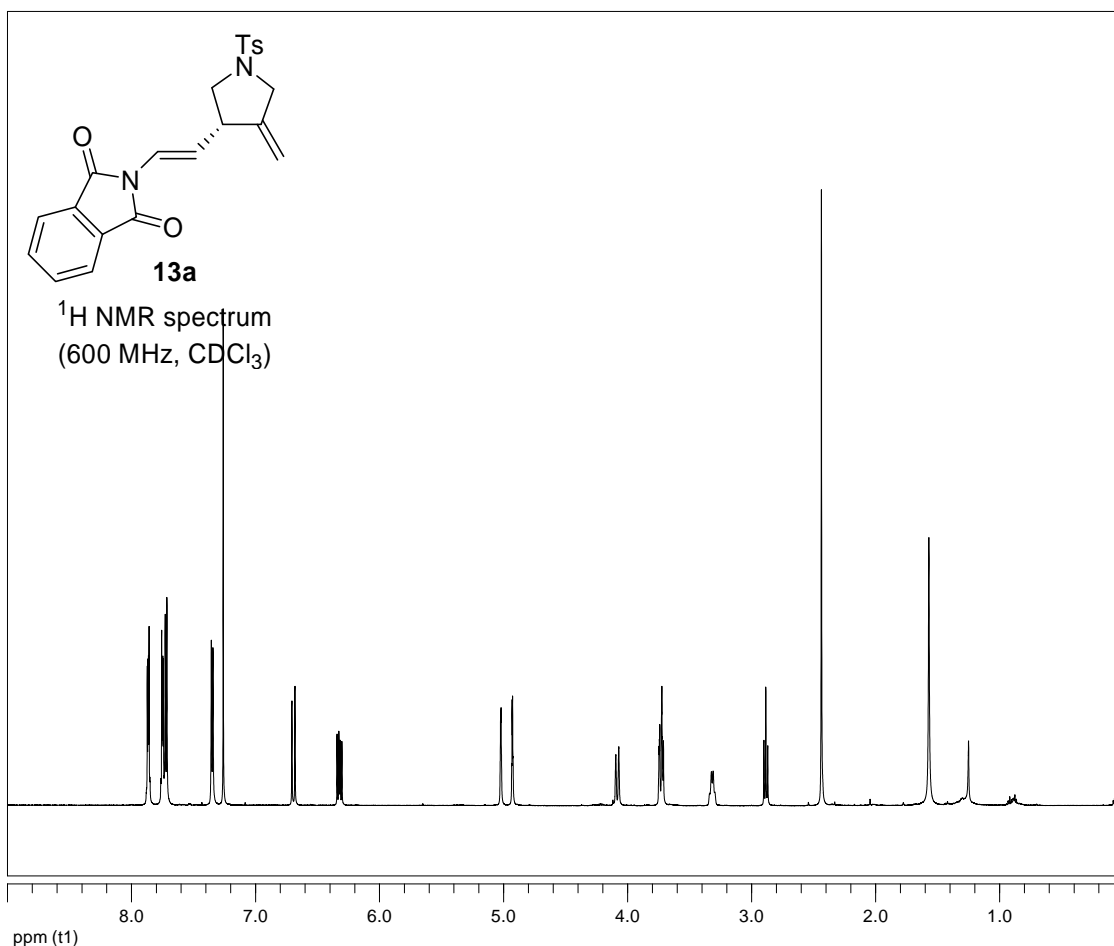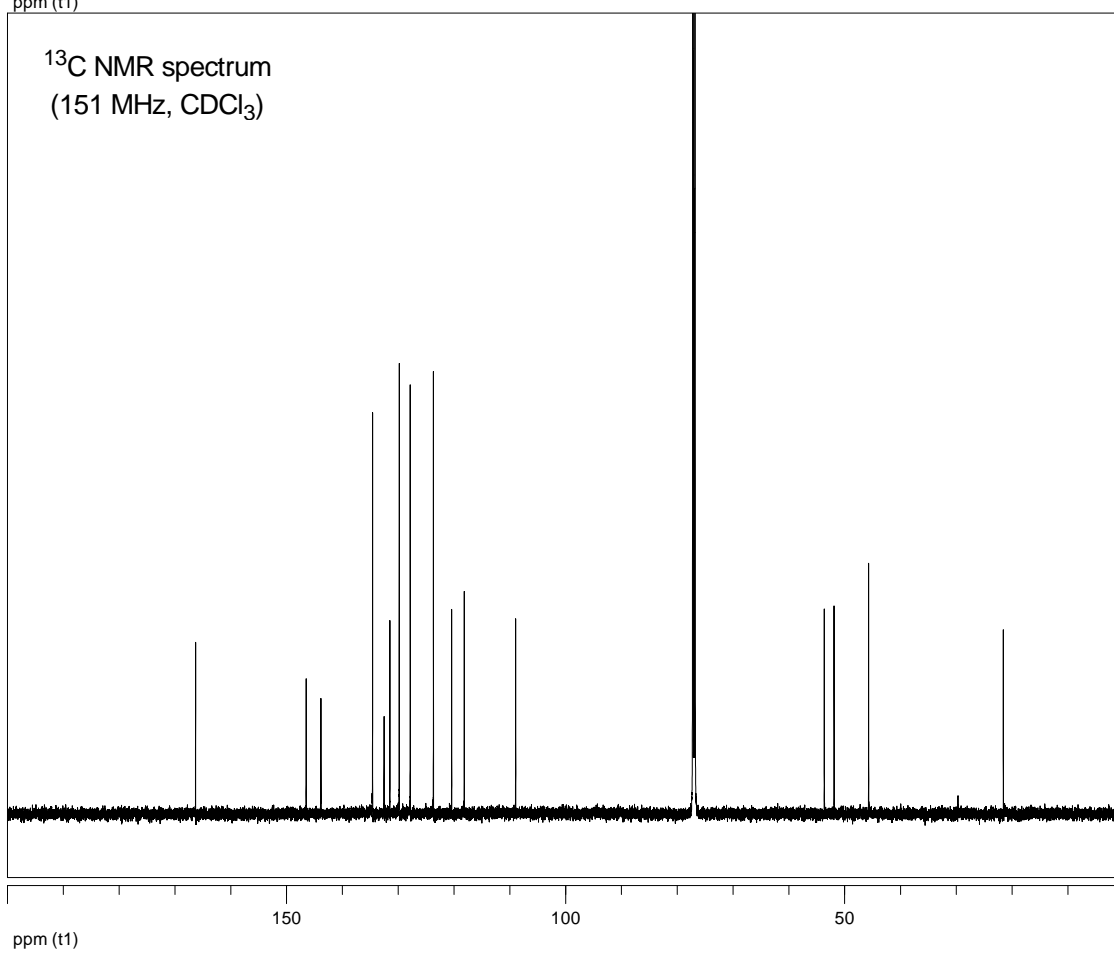

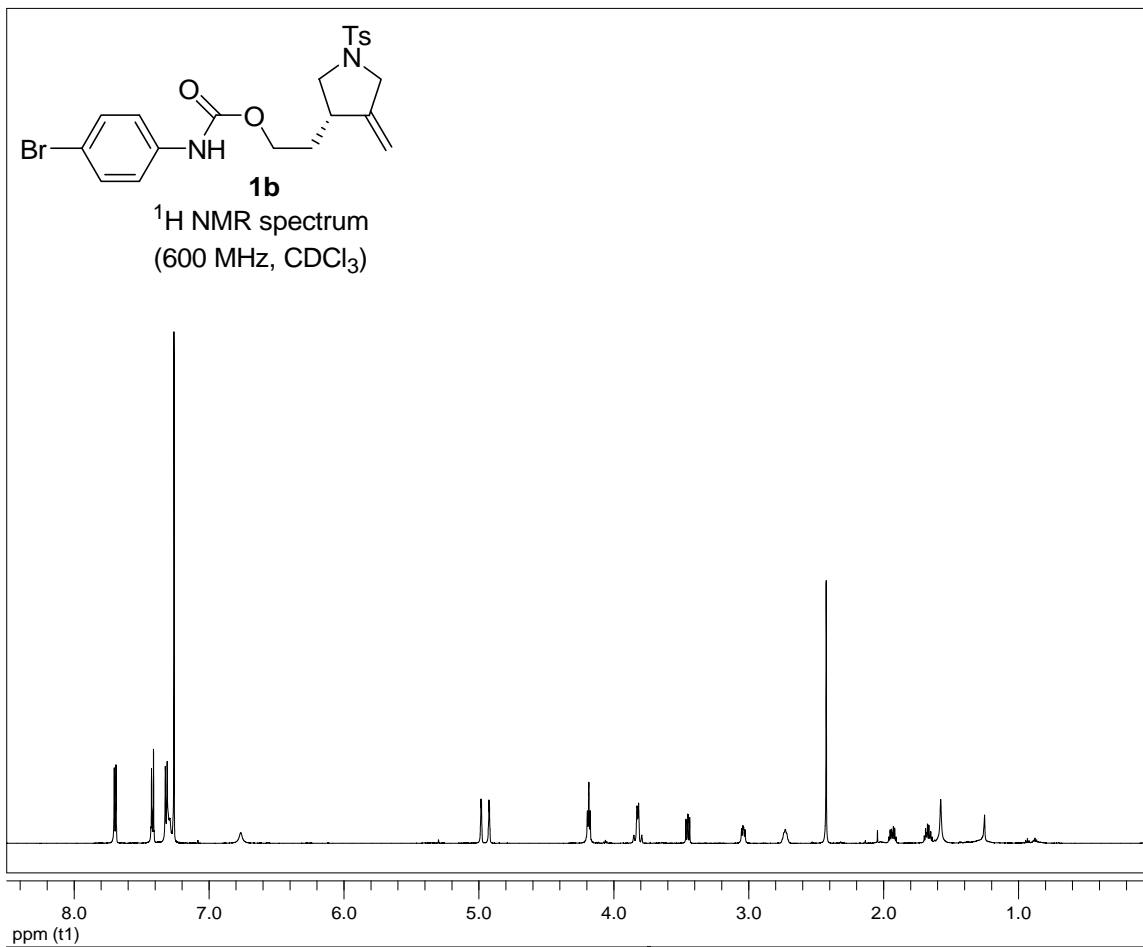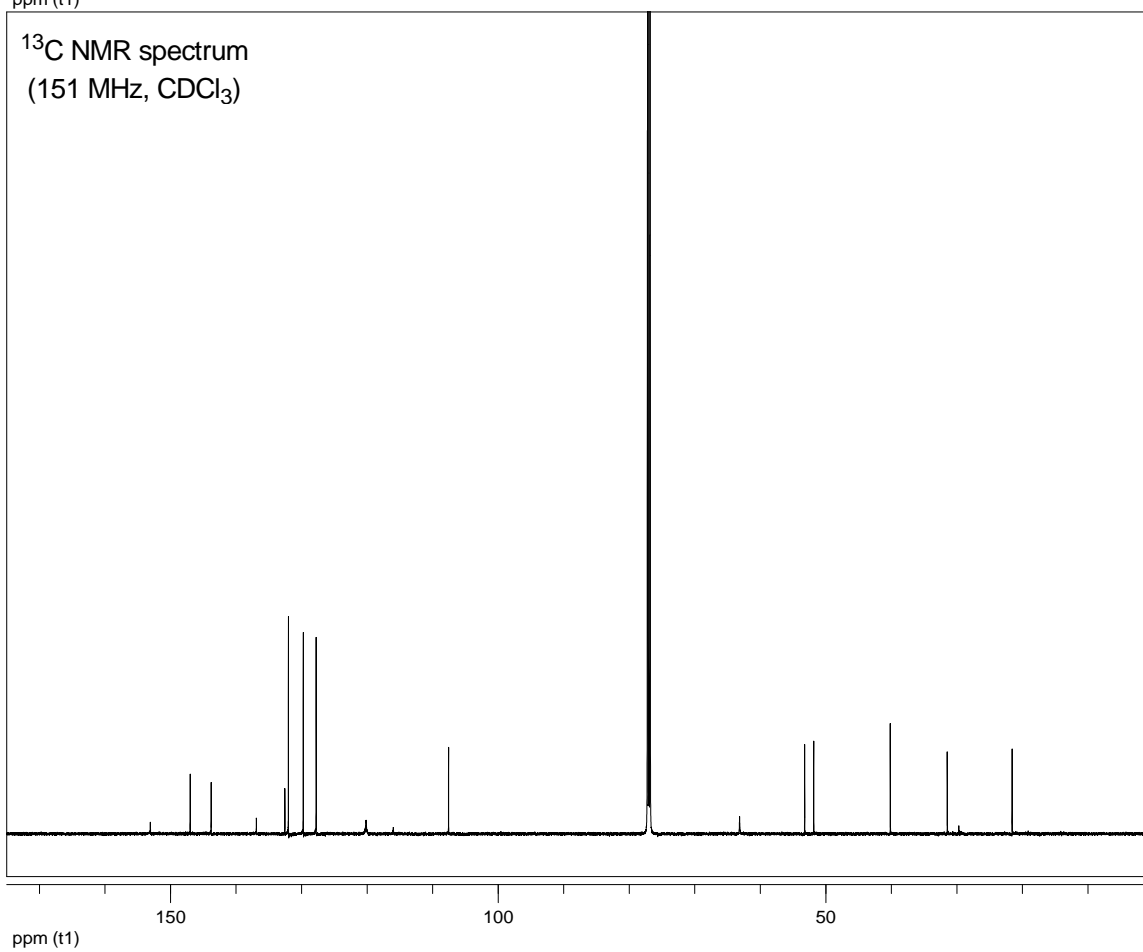

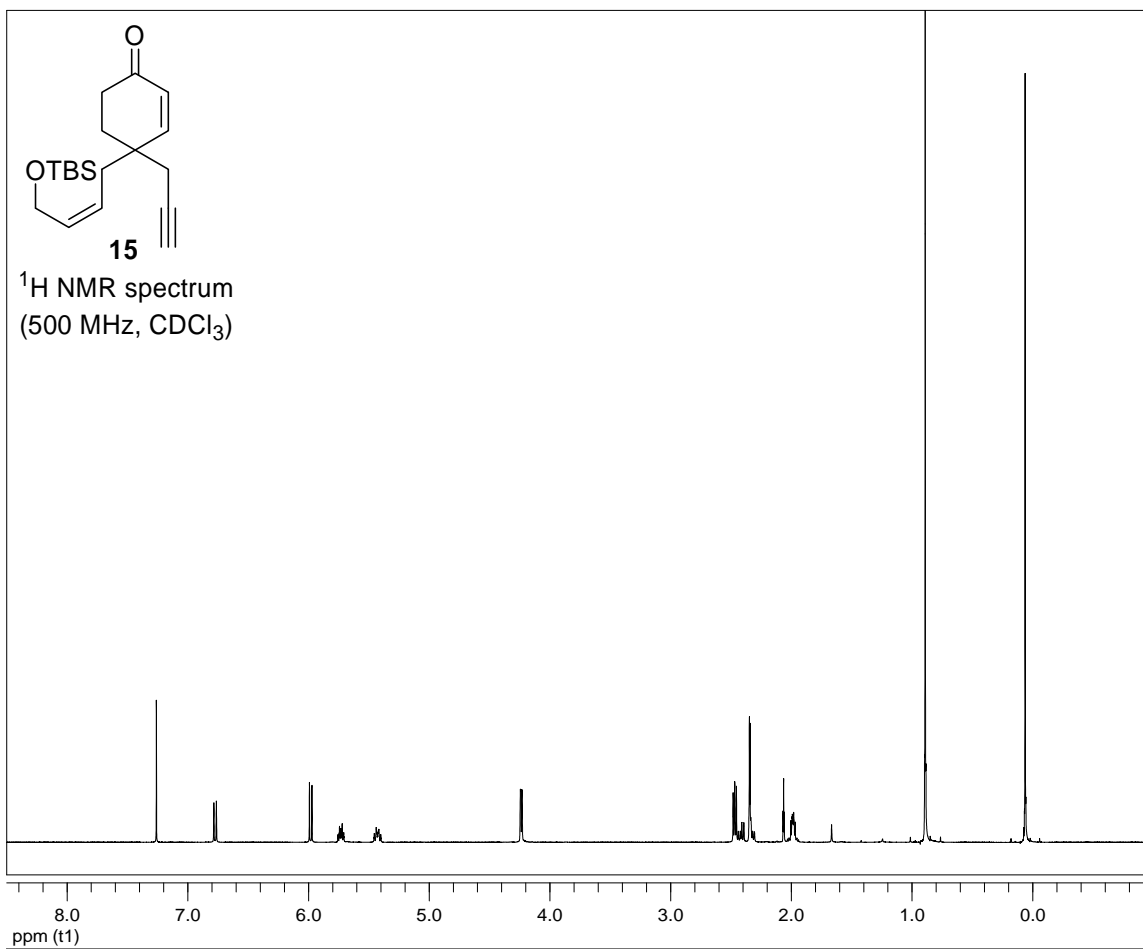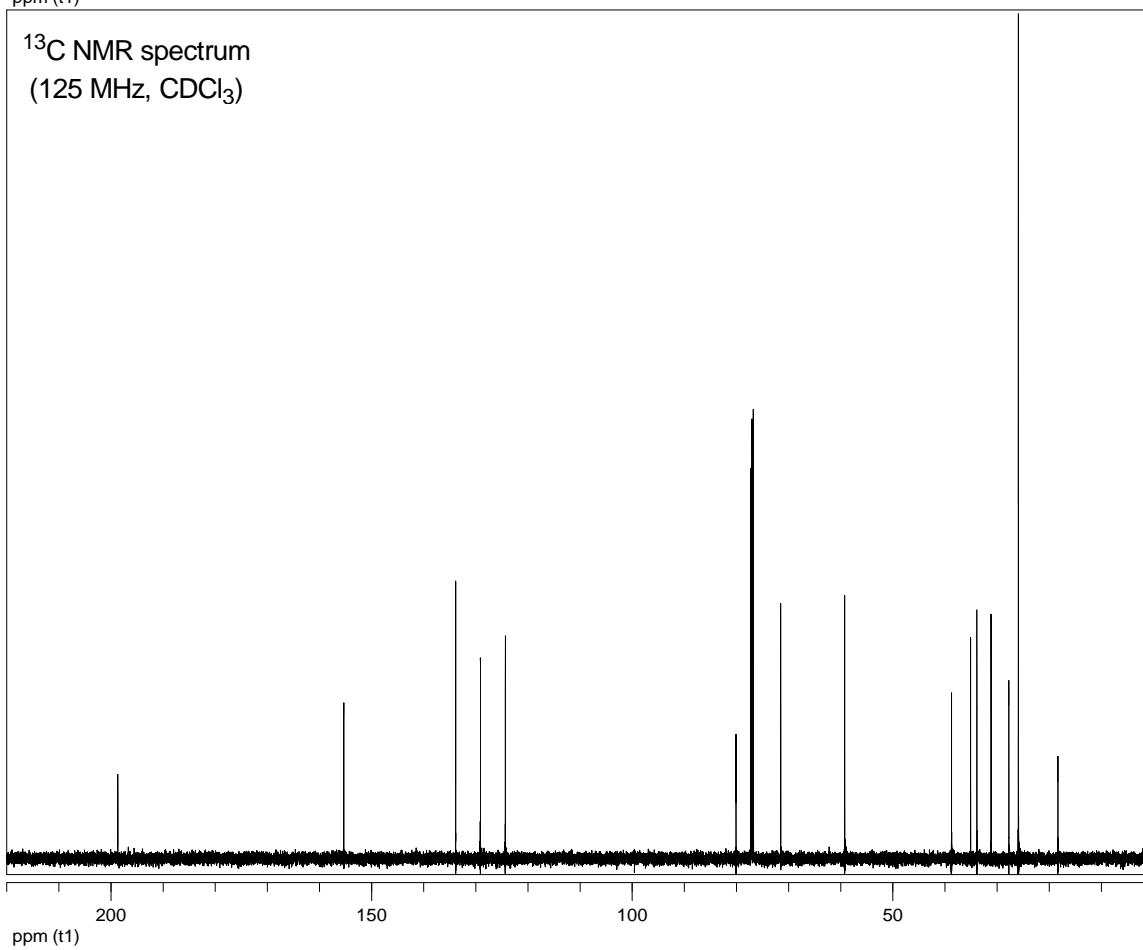

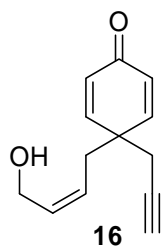

$^1\text{H}$  NMR spectrum  
(500 MHz,  $\text{CDCl}_3$ )

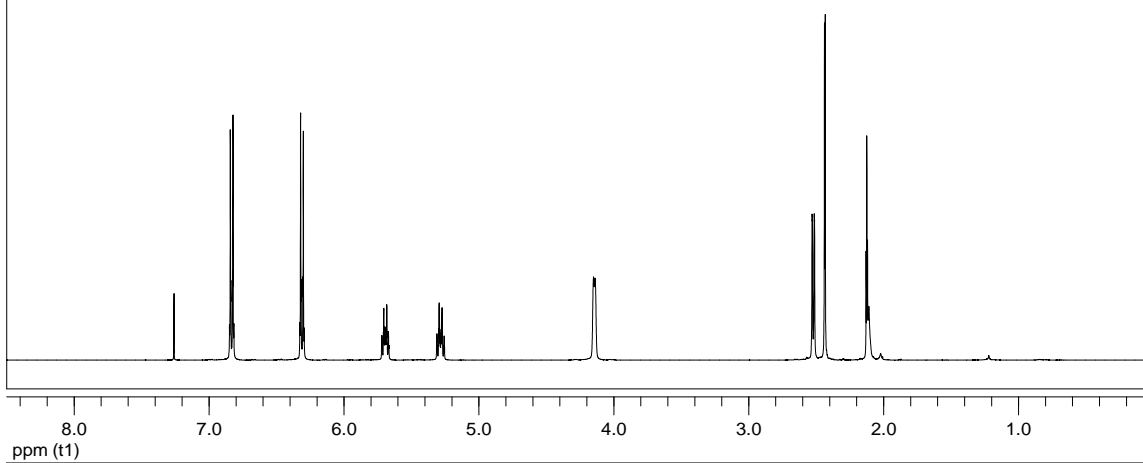

$^{13}\text{C}$  NMR spectrum  
(125 MHz,  $\text{CDCl}_3$ )

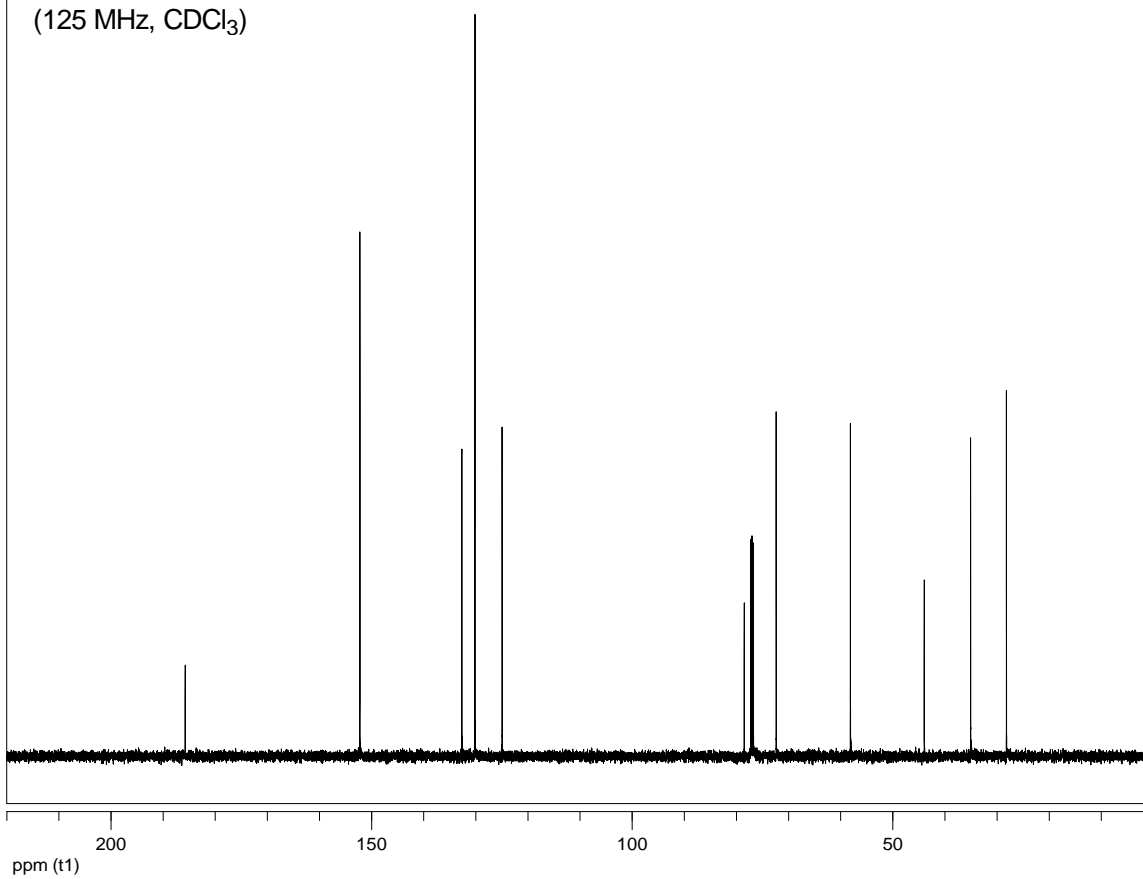

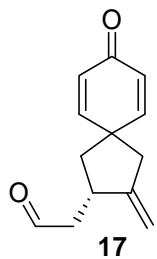

$^1\text{H}$  NMR spectrum  
(600 MHz,  $\text{CDCl}_3$ )

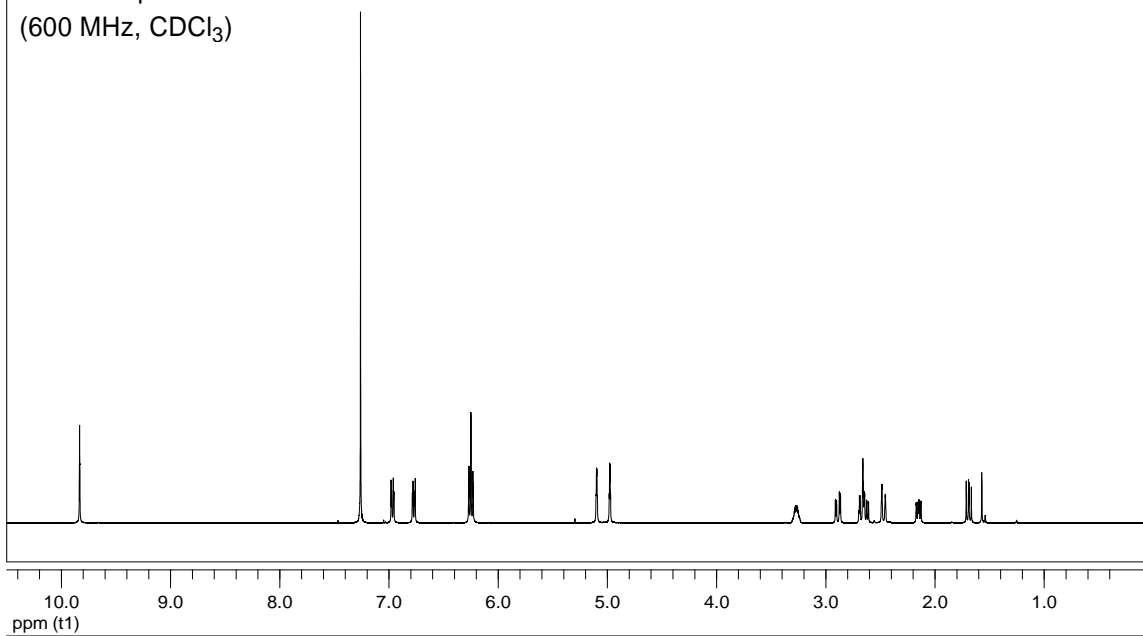

$^{13}\text{C}$  NMR spectrum  
(125 MHz,  $\text{CDCl}_3$ )

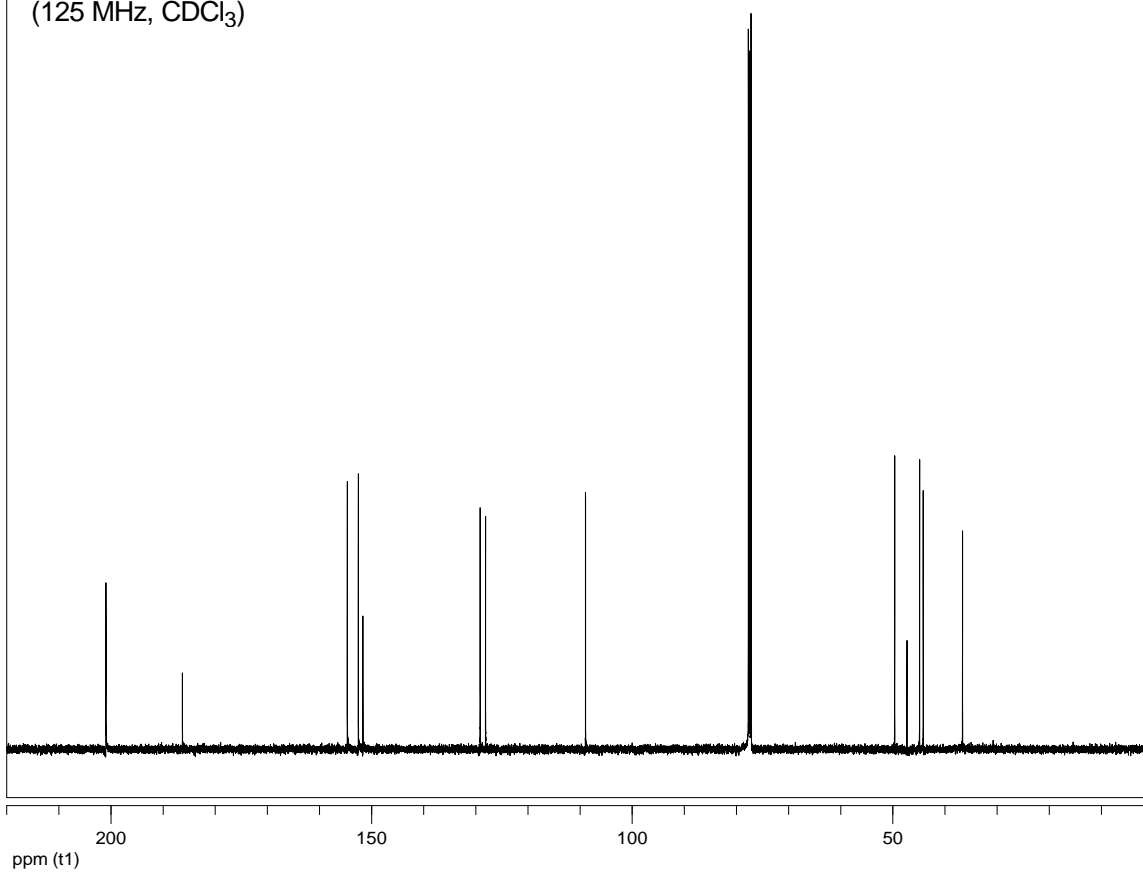

**HPLC Traces.** Racemic and optically active *p*-bromobenzoate esters (Table 2, entries 1 and 2) or ethylene glycol acetals (Table 2, entries 6 and 11, and compound **15**) were analyzed with chiral HPLC (OD-H column, 1 mL/min) to determine retention time and enantiomeric excesses.

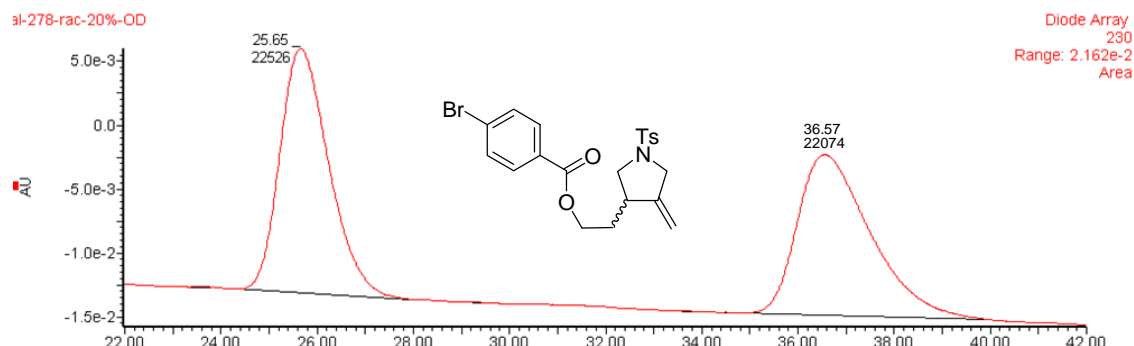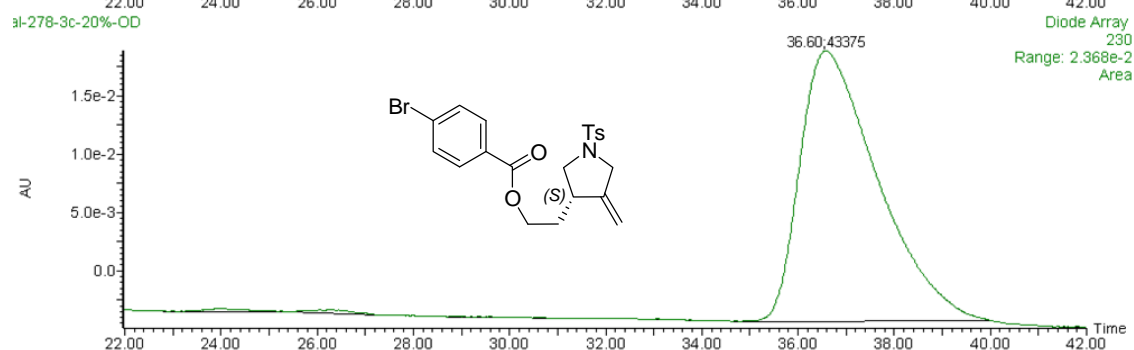

| entry 1 | mobile phase                   | $t_r$ (R) | $t_r$ (S) | ee (%) |
|---------|--------------------------------|-----------|-----------|--------|
| (±)     | <i>i</i> -PrOH:hexanes (20:80) | 25.65 min | 36.57 min | -      |
| (S)     | <i>i</i> -PrOH:hexanes (20:80) | -         | 36.60 min | >99    |

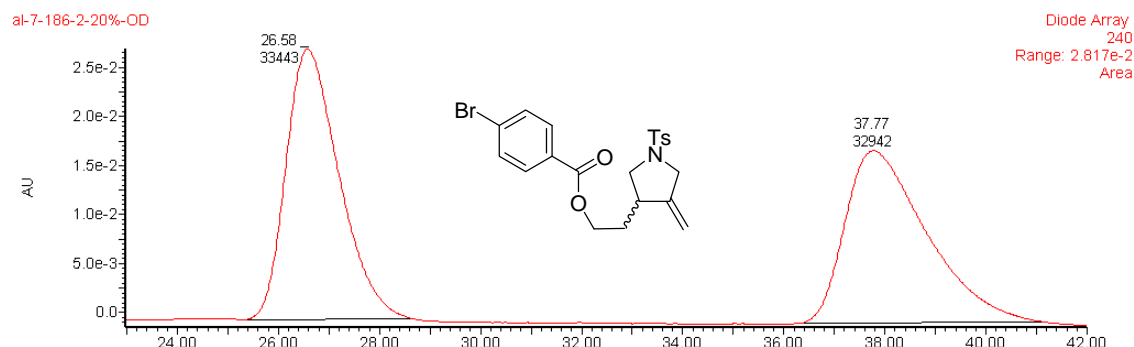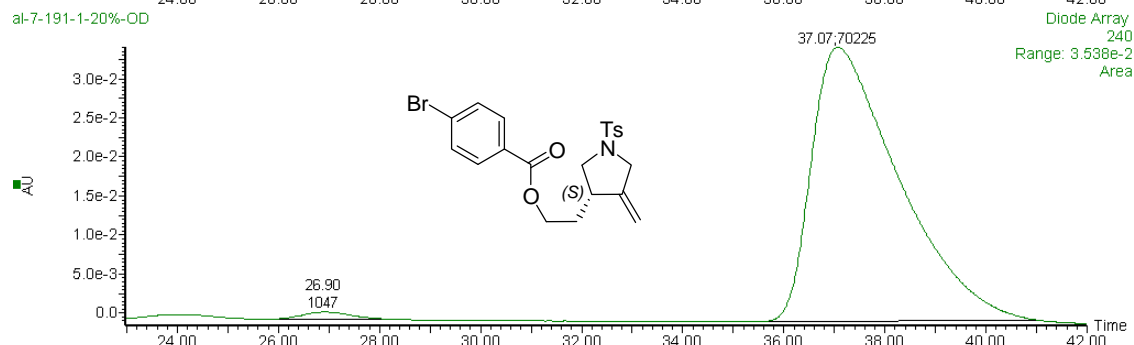

| entry 2 | mobile phase                   | $t_r$ (R) | $t_r$ (S) | ee (%) |
|---------|--------------------------------|-----------|-----------|--------|
| (±)     | <i>i</i> -PrOH:hexanes (20:80) | 26.58 min | 37.77 min | -      |
| (S)     | <i>i</i> -PrOH:hexanes (20:80) | 26.90 min | 37.07 min | 97     |

al-7-175-1-10%-OD

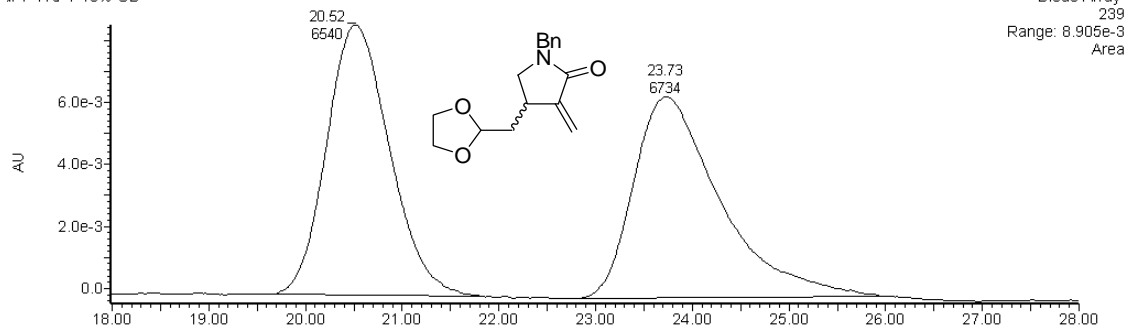

al-7-187-1-10%-OD

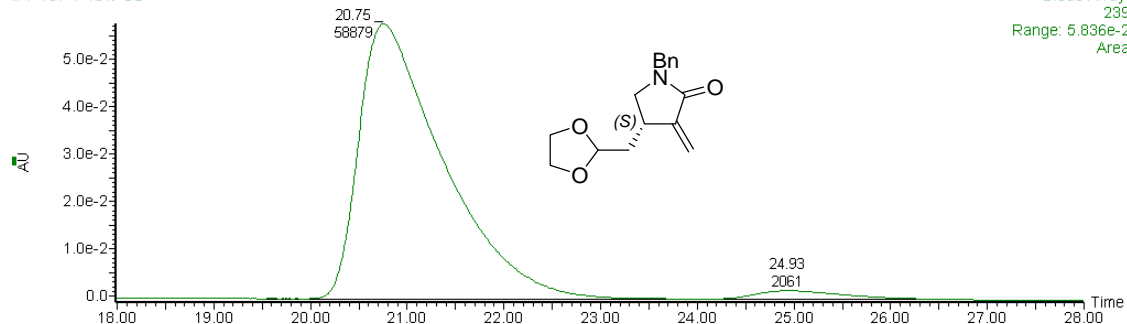

| entry 6 | mobile phase                   | $t_r$ (S) | $t_r$ (R) | ee (%) |
|---------|--------------------------------|-----------|-----------|--------|
| (±)     | <i>i</i> -PrOH:hexanes (10:90) | 20.52 min | 23.73 min | -      |
| (S)     | <i>i</i> -PrOH:hexanes (10:90) | 20.75 min | 24.93 min | 93     |

al-7-172-2-20%-OD

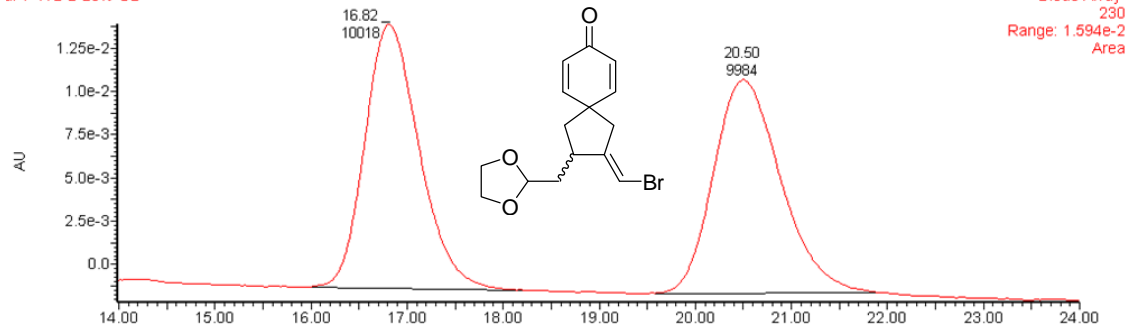

al-7-174-1-20%-OD

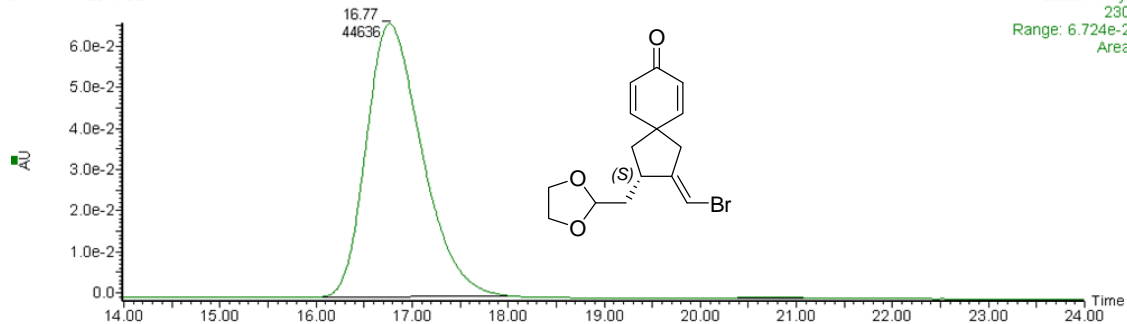

| entry 11 | mobile phase                   | $t_r$ (S) | $t_r$ (R) | ee (%) |
|----------|--------------------------------|-----------|-----------|--------|
| (±)      | <i>i</i> -PrOH:hexanes (20:80) | 16.82 min | 20.50 min | -      |
| (S)      | <i>i</i> -PrOH:hexanes (20:80) | 16.77 min | -         | >99    |

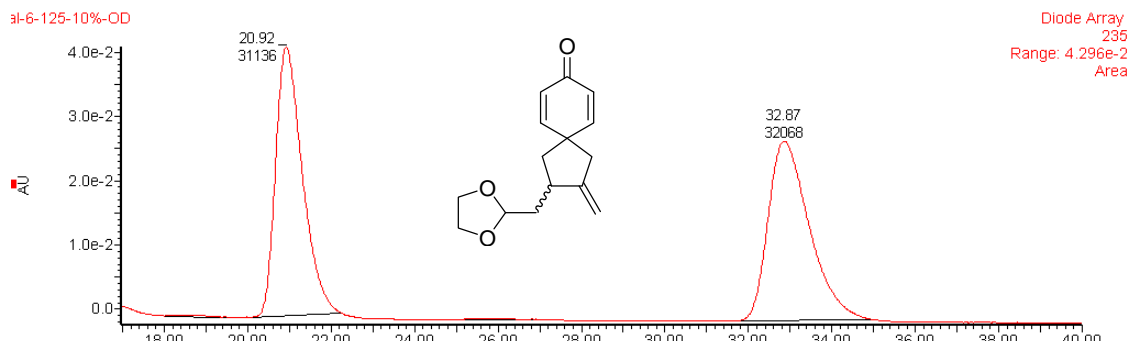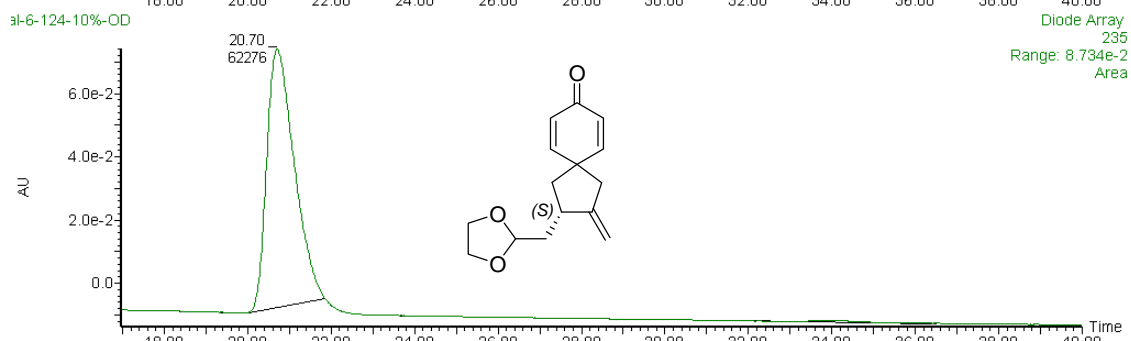

| 17  | mobile phase                   | $t_r$ (S) | $t_r$ (R) | ee (%) |
|-----|--------------------------------|-----------|-----------|--------|
| (±) | <i>i</i> -PrOH:hexanes (10:90) | 20.92 min | 32.87 min | -      |
| (S) | <i>i</i> -PrOH:hexanes (10:90) | 20.70 min | -         | >99    |

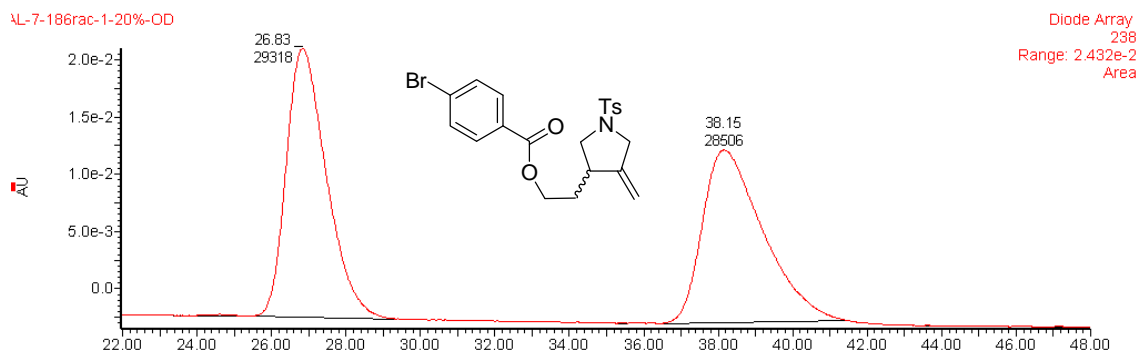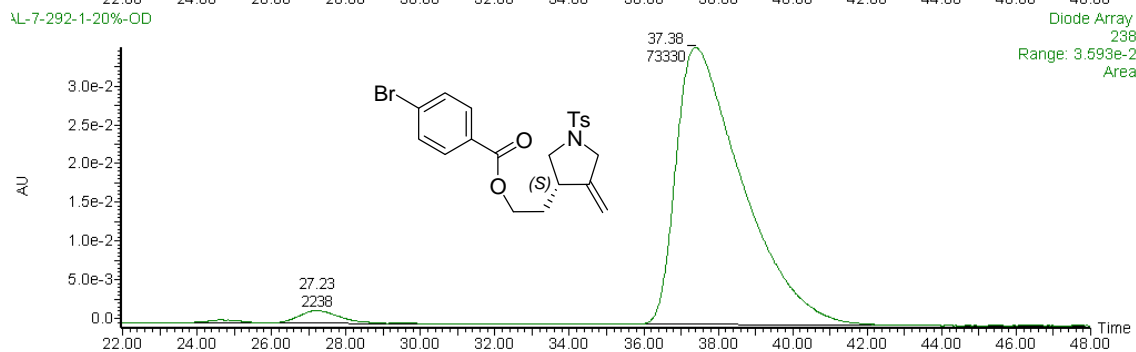

| Entry 13 | mobile phase                   | $t_r$ (R) | $t_r$ (S) | ee (%) |
|----------|--------------------------------|-----------|-----------|--------|
| (±)      | <i>i</i> -PrOH:hexanes (10:90) | 26.83 min | 38.15 min | -      |
| (S)      | <i>i</i> -PrOH:hexanes (10:90) | 27.23 min | 37.38 min | 94     |

**$^{19}\text{F}$  and  $^1\text{H}$  NMR spectroscopic analysis.** For entries 3–5 and 7–10 in Table 2, enantiomeric excesses were determined by  $^{19}\text{F}$  or  $^1\text{H}$  NMR spectroscopic analysis of the Mosher esters derived from corresponding racemic and optically active aldehydes.

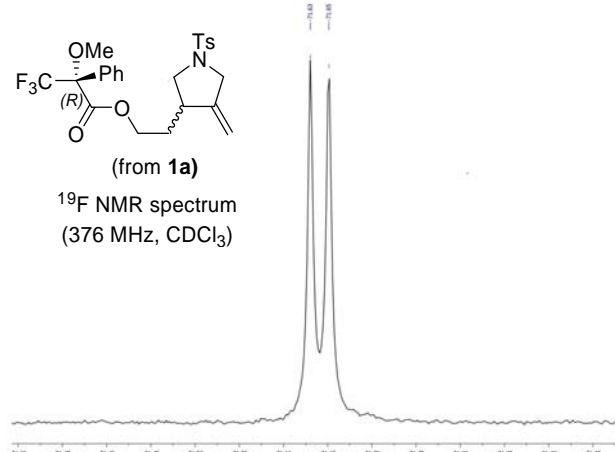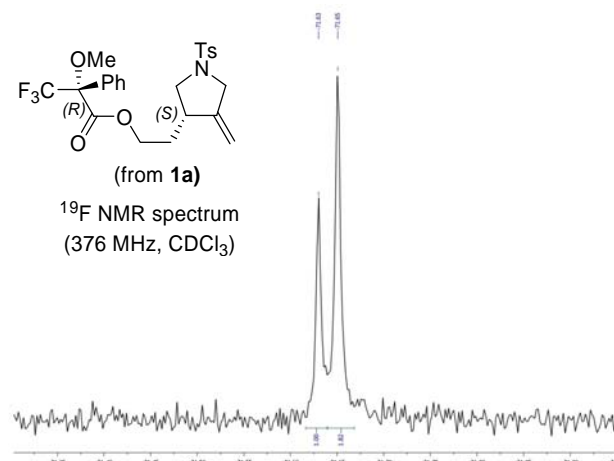

| entry 3                             | chemical shift ( <i>R, S</i> ) | chemical shift ( <i>R, R</i> ) | ee (%) |
|-------------------------------------|--------------------------------|--------------------------------|--------|
| ( <i>R, S</i> ) and ( <i>R, R</i> ) | -71.65 ppm                     | -71.63 ppm                     | -      |
| ( <i>R, S</i> )                     | -71.65 ppm                     | -71.63 ppm                     | 29     |

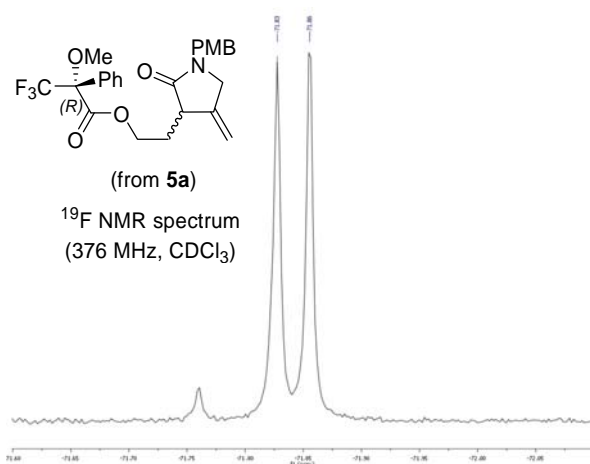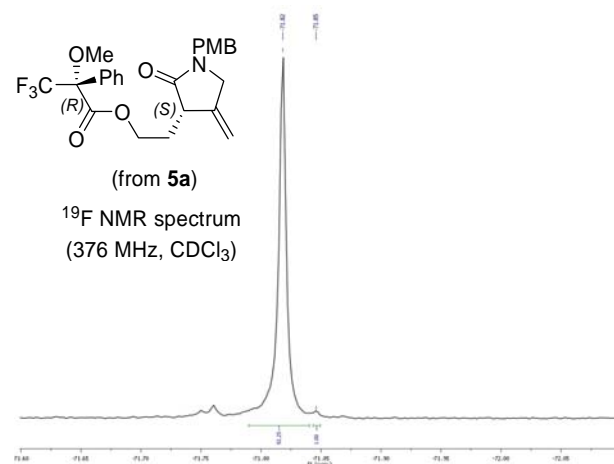

| entry 5                             | chemical shift ( <i>R, S</i> ) | chemical shift ( <i>R, R</i> ) | ee (%) |
|-------------------------------------|--------------------------------|--------------------------------|--------|
| ( <i>R, S</i> ) and ( <i>R, R</i> ) | -71.83 ppm                     | -71.86 ppm                     | -      |
| ( <i>R, S</i> )                     | -71.82 ppm                     | -71.85 ppm                     | 98     |

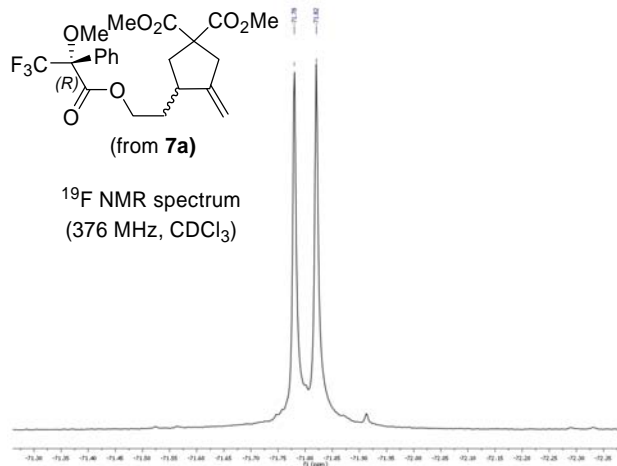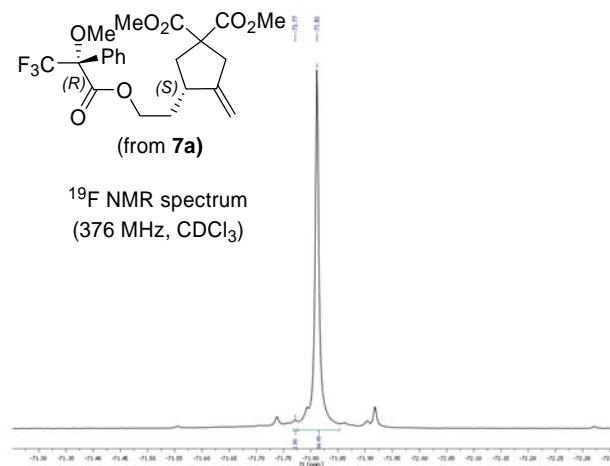

| entry 7                             | chemical shift ( <i>R, S</i> ) | chemical shift ( <i>R, R</i> ) | ee (%) |
|-------------------------------------|--------------------------------|--------------------------------|--------|
| ( <i>R, S</i> ) and ( <i>R, R</i> ) | -71.82 ppm                     | -71.78 ppm                     | -      |
| ( <i>R, S</i> )                     | -71.81 ppm                     | -71.77 ppm                     | 97     |

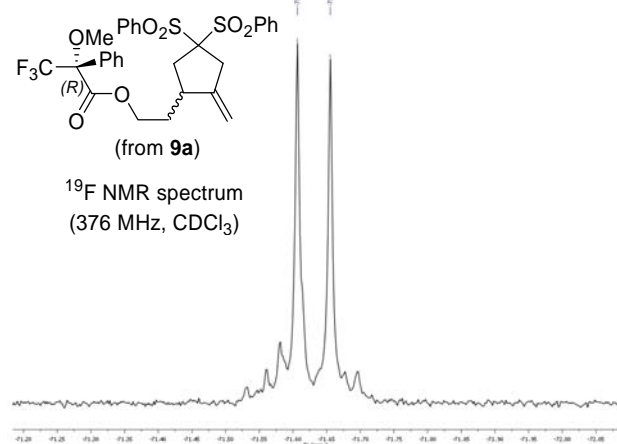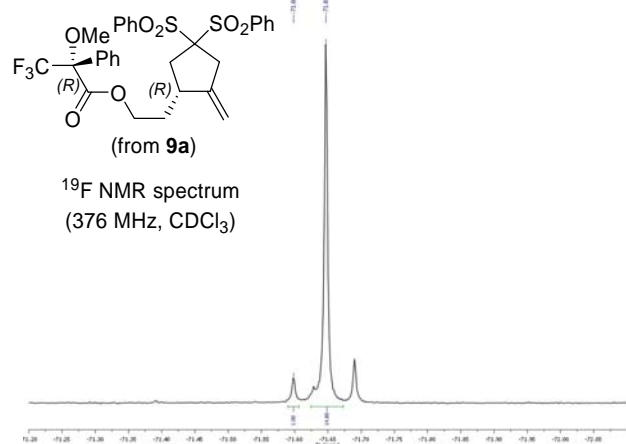

| entry 9                             | chemical shift ( <i>R, R</i> ) | chemical shift ( <i>R, S</i> ) | ee (%) |
|-------------------------------------|--------------------------------|--------------------------------|--------|
| ( <i>R, R</i> ) and ( <i>R, S</i> ) | -71.66 ppm                     | -71.61 ppm                     | -      |
| ( <i>R, R</i> )                     | -71.65 ppm                     | -71.60 ppm                     | 87     |

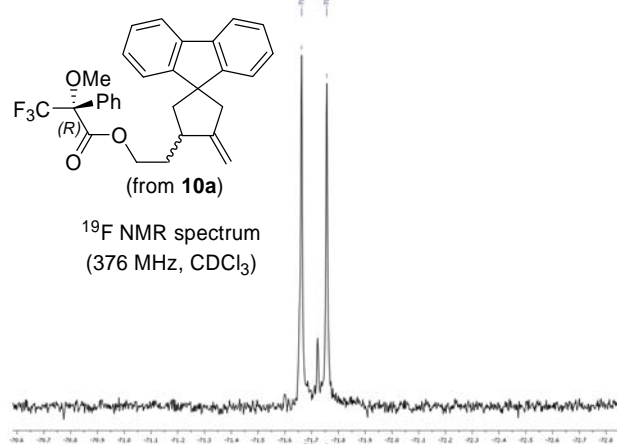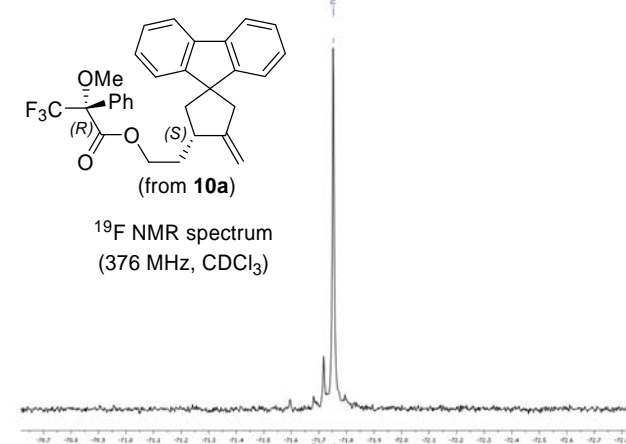

| entry 10                            | chemical shift ( <i>R, R</i> ) | chemical shift ( <i>R, S</i> ) | ee (%) |
|-------------------------------------|--------------------------------|--------------------------------|--------|
| ( <i>R, R</i> ) and ( <i>R, S</i> ) | -71.66 ppm                     | -71.76 ppm                     | -      |
| ( <i>R, S</i> )                     | -                              | -71.75 ppm                     | >98    |

Entry 4

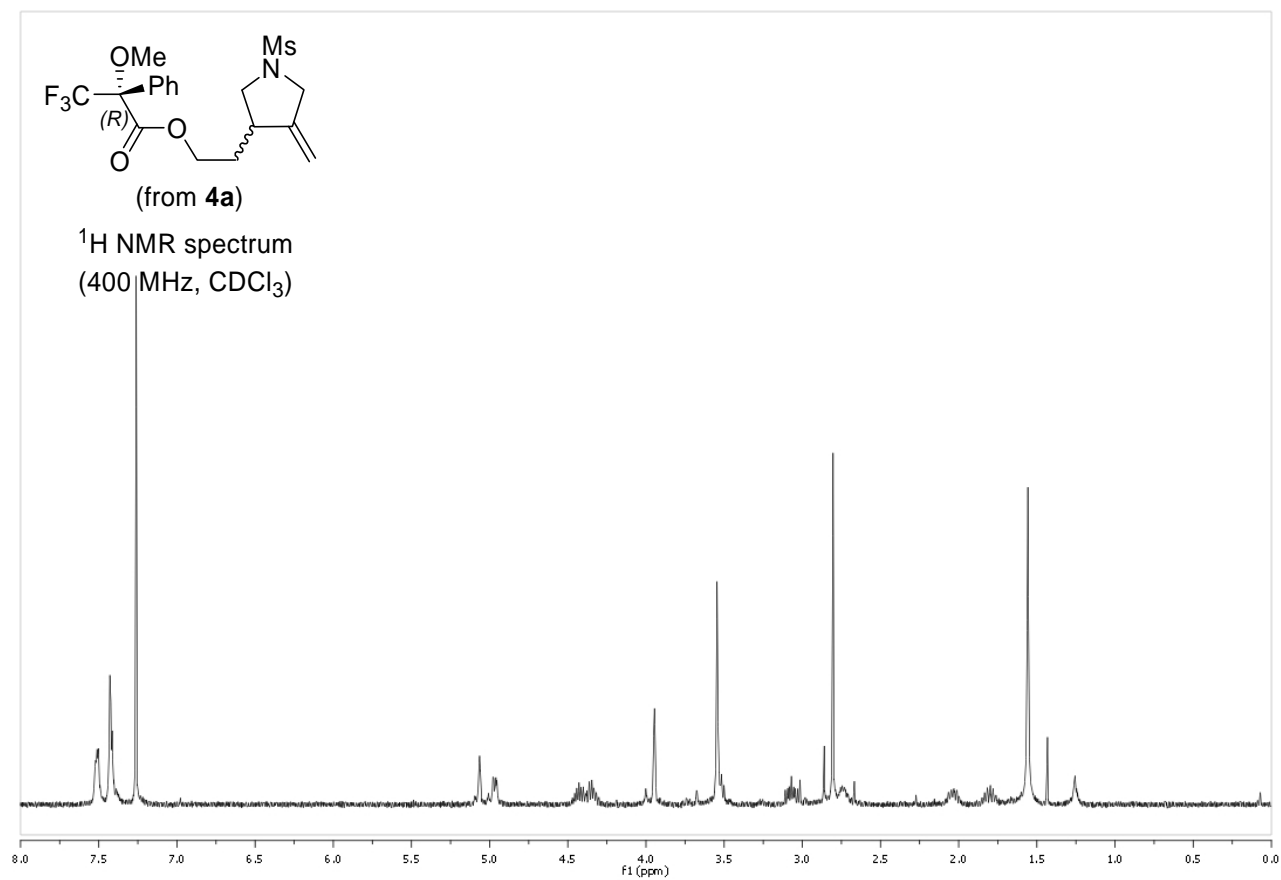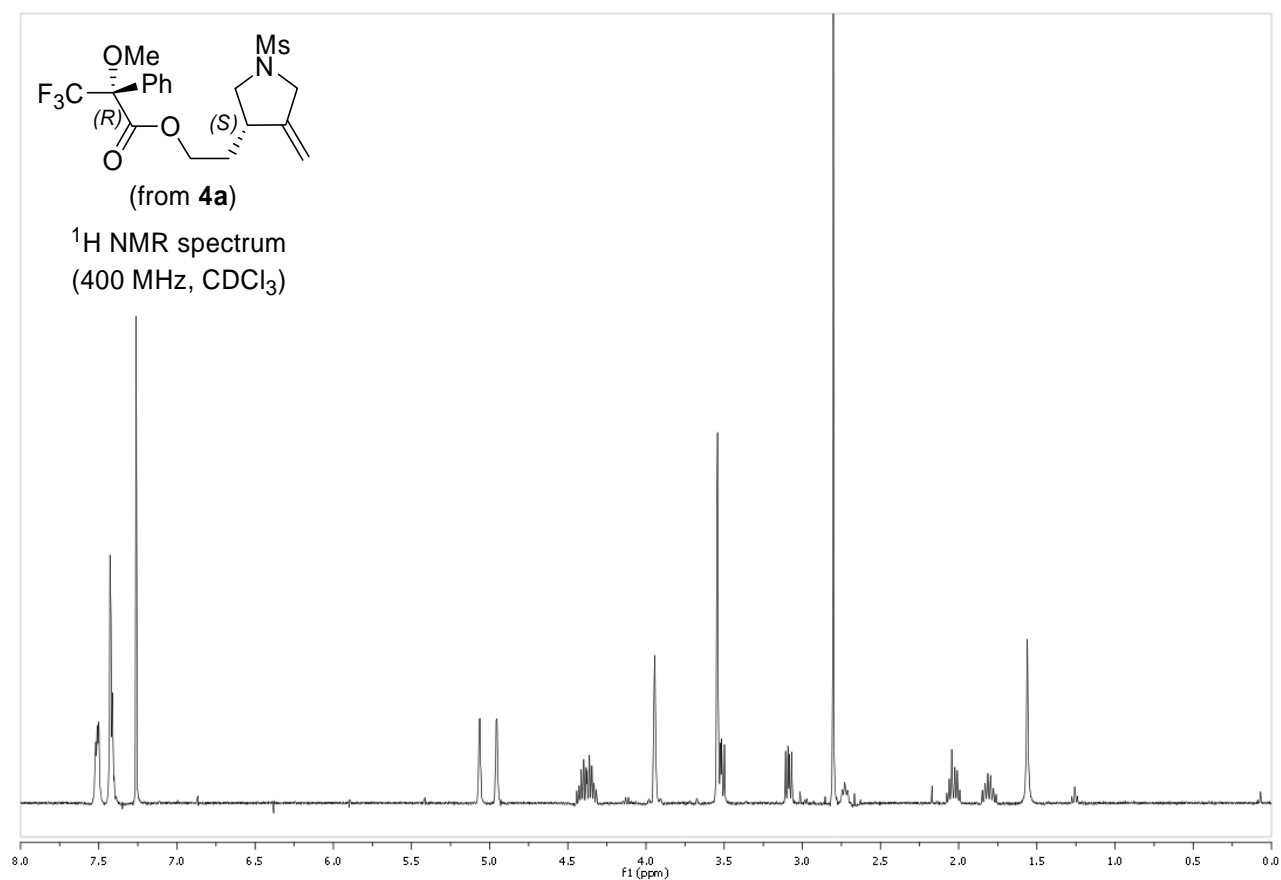

Entry 8

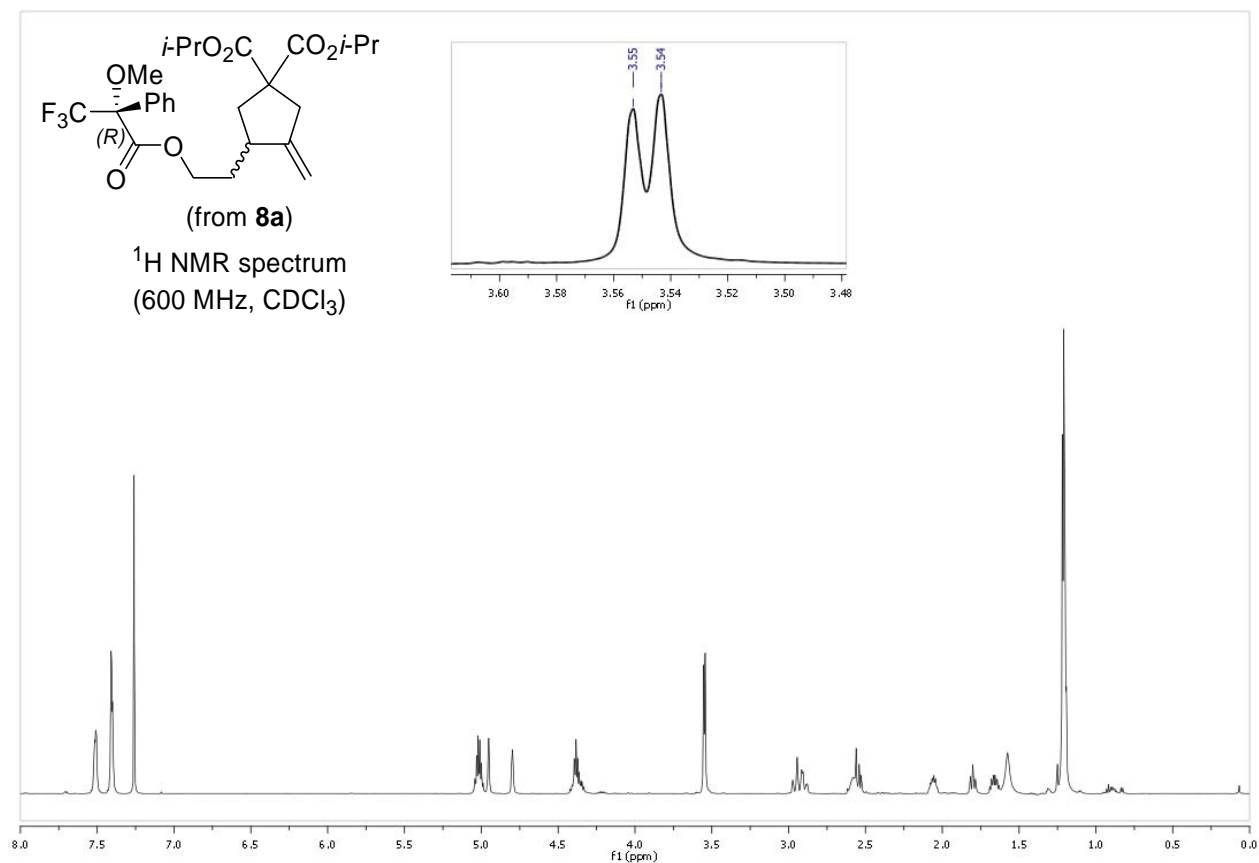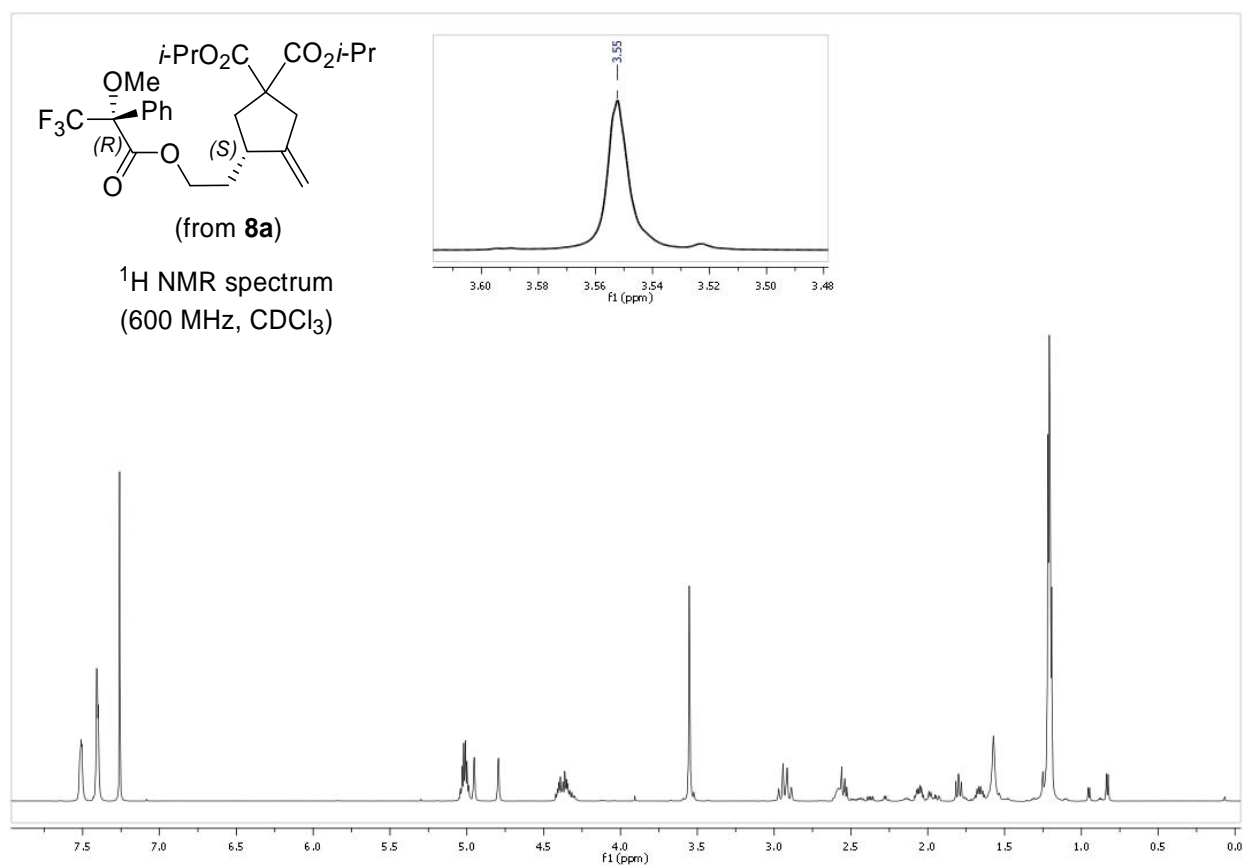

Entry 12

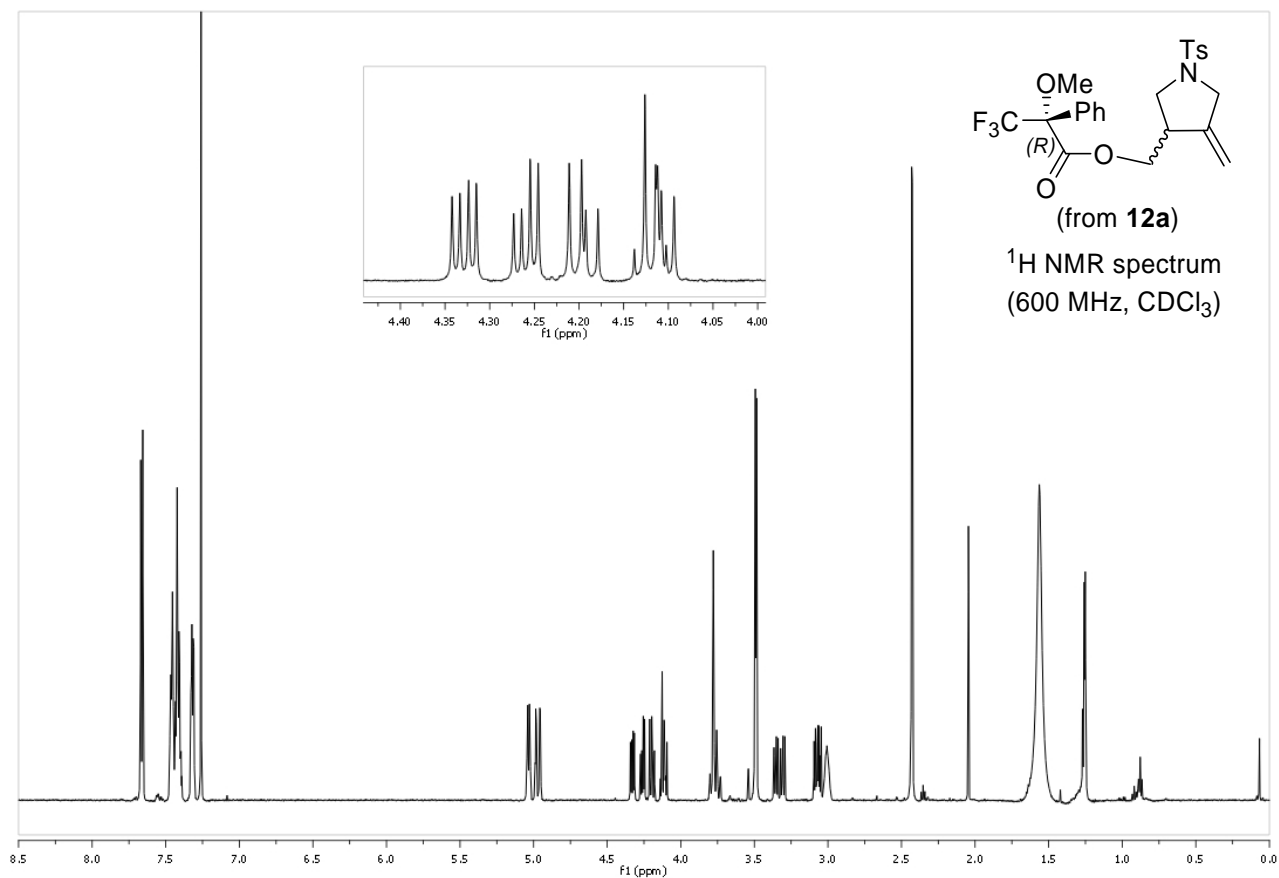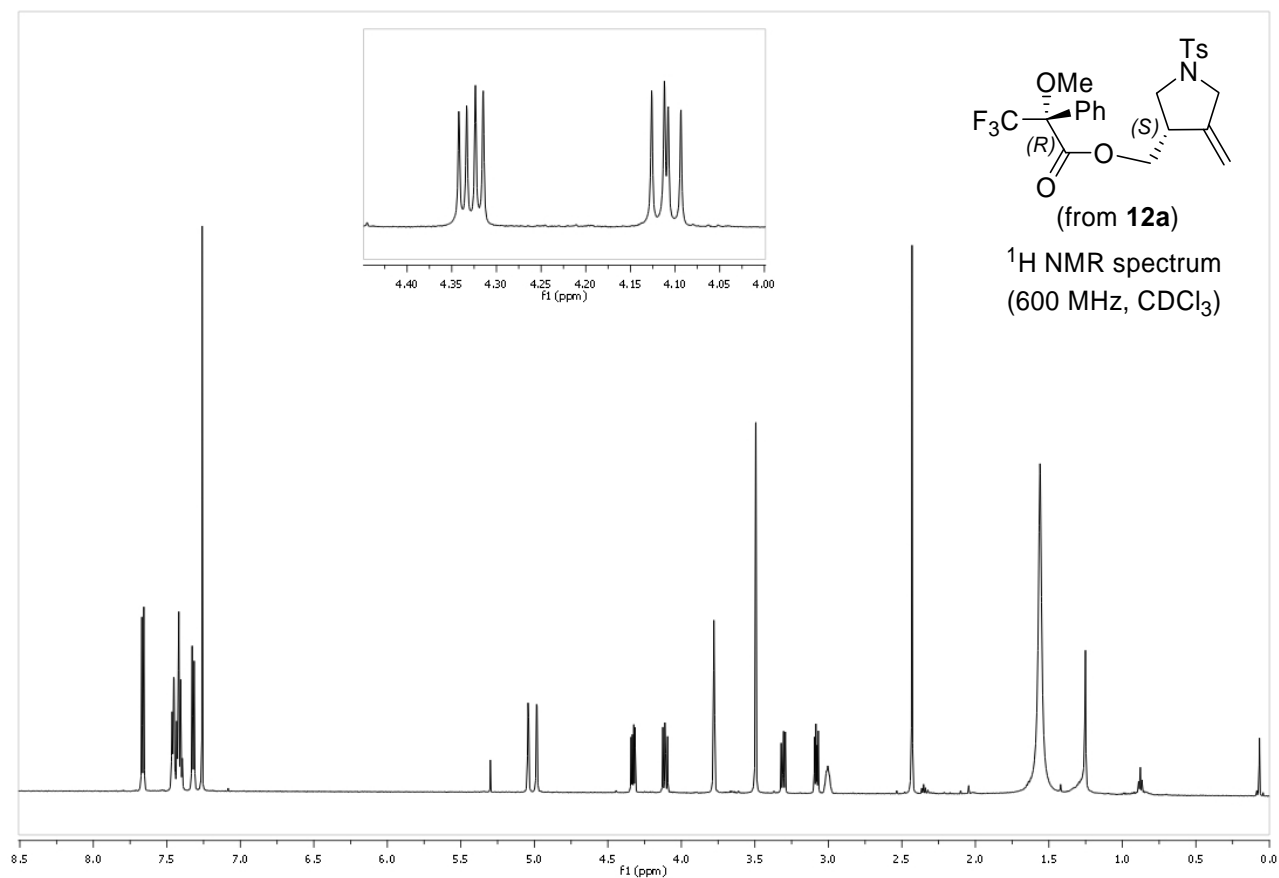

Supplement: NIHMS151258-supplement-Sup_Data.pdf [file NIHMS151258-supplement-Sup_Data.pdf]
